# Supplementary material for: G-quadruplex-guided cisplatin triggers multiple pathways in targeted chemotherapy and immunotherapy
Source: Royal Society of Chemistry journal article supplement (doi:10.1039/d4sc00643g), 2024-01-01
Supplement: d4sc00643g1.pdf [file d4sc00643g1.pdf]

## Supporting Information

### **G-Quadruplex-Guided Cisplatin Triggers Multiple Pathways in Targeted Chemotherapy and Immunotherapy**

Tian-Zhu Ma,<sup>a</sup> Liu-Yi Liu,<sup>a</sup> You-Liang Zeng,<sup>a</sup> Ke Ding,<sup>c</sup> Hang Zhang,<sup>a</sup> Wenting Liu,<sup>\*a</sup> Qian Cao,<sup>a</sup> Wei Xia,<sup>a</sup> Xushen Xiong,<sup>\*c</sup> Chao Wu,<sup>\*b</sup> Zong-Wan Mao<sup>\*a</sup>

<sup>a</sup> MOE Key Laboratory of Bioinorganic and Synthetic Chemistry, School of Chemistry, IGCME, GBRCE for Functional Molecular Engineering, Sun Yat-Sen University, Guangzhou 510275, P. R. China

<sup>b</sup> Department of Neurology, The First Affiliated Hospital, Guangdong Provincial Key Laboratory of Diagnosis and Treatment of Major Neurological Diseases, National Key Clinical Department and Key Discipline of Neurology, Sun Yat-sen University, Guangzhou 510080, P. R. China

<sup>c</sup> The Second Affiliated Hospital & Liangzhu Laboratory, Zhejiang University School of Medicine, Hangzhou 311121, P. R. China. E-mail: xiongxs@zju.edu.cn

\*Corresponding Author(s): liuwenting@mail.sysu.edu.cn; xiongxs@zju.edu.cn;  
wuch35@mail.sysu.edu.cn; cesmzw@mail.sysu.edu.cn

# Contents

## Experimental Procedures

**Scheme S1.** The synthesis pathways of **CP**, **TP** and **DP**.

**Fig. S1**  $^1\text{H}$  NMR spectrum of **CP** in  $\text{DMSO-}d_6$ .

**Fig. S2**  $^{13}\text{C}$  NMR spectrum of **CP** in  $\text{DMSO-}d_6$ .

**Fig. S3** Mass spectrum of **CP**.

**Fig. S4**  $^1\text{H}$  NMR spectrum of **TP** in  $\text{DMSO-}d_6$ .

**Fig. S5**  $^{13}\text{C}$  NMR spectrum of **TP** in  $\text{DMSO-}d_6$ .

**Fig. S6** Mass spectrum of **TP**.

**Fig. S7**  $^1\text{H}$  NMR spectrum of **DP** in  $\text{DMSO-}d_6$ .

**Fig. S8**  $^{13}\text{C}$  NMR spectrum of **DP** in  $\text{DMSO-}d_6$ .

**Fig. S9** Representative structure of the 1:1 **CP**-c-MYC, VEGF and MYT1L complex.

**Fig. S10** (a) Thermal stabilization of MYT1L with **CP**, **TP**, **DP** and **PyPDS** while competing with increasing ratios of ds-12CT for binding to ligands.

**Fig. S11** ESI-MS of c-MYC, VEGF, MYT1L and dsDNA interacting with **CP**, **TP** and **DP**.

**Fig. S12** The amount of Pt in cell, nucleus and the amount of Pt in the genomic DNA of MDA-MB-231 cells after treated with different concentrations of **CP**, **TP** and **DP** for 24 h.

**Fig. S13** Distribution on chromosomes and GO enrichment of target gene.

**Fig. S14** (a) Venn diagram of the effects of compounds on genes. (b) Pie chart of the proportion of G4 deletions in whole-genome sequencing in the **CP** group.

**Fig. S15** Heatmap diagram of Pearson correlation coefficients between the RNA-seq samples.

**Fig. S16** Cluster analysis and Heatmap displayed the overview of the differentially expressed genes (DEGs) induced by **CP**, **TP**, **DP** and **PyPDS** for 24 h.

**Fig. S17** Volcano plots showing the DEGs in MDA-MB-231 cells treated with **CP** for 24 h.

**Fig. S18** Volcano plots showing the DEGs in MDA-MB-231 cells treated with **TP** for 24 h.

**Fig. S19** Volcano plots showing the DEGs in MDA-MB-231 cells treated with **DP** for 24 h.

**Fig. S20** Volcano plots showing the DEGs in MDA-MB-231 cells treated with **PyPDS** for 24 h.

**Fig. S21** GO enrichment analysis of DEGs.

**Fig. S22** KEGG enrichment analysis of differentially expressed genes after **CP**, **TP**, **DP** and **PyPDS**

treated for 24 h.

**Fig. S23** GSEA reveals positive enrichment of genes altered in cells subjected after **CP**, **TP**, **DP** and **PyPDS** treated.

**Fig. S24** The impact of different inhibitors on cell death induced by compounds.

**Fig. S25** Un-cropped western blotting images of Fig. 2f.

**Fig. S26** Un-cropped western blotting images of Fig. 3g.

**Fig. S27** Un-cropped western blotting images of Fig. 4g.

**Fig. S28** (a) Representative photographs of mice in the **CP** group at 24 days before sacrifice. (b) Volume changes of primary and distant tumors (n=4). Errors are s.d. (n≥3). (c-e) the secretion of cytokines (cGAMP, IL-18 and IL-1β) in serum on Day 16.

**Fig. S29** Hematoxylin and eosin (H&E) staining of the main organs from mice with different treatment.

**Table S1-3** The representative docked free energies of the docking models between **CP** and c-MYC, VEGF, MYT1L G4 DNA.

**Table S4** List of DNA sequences used in this research.

**Table S5.** The nearest gene of ChromHMM annotation.

**Table S6.** The Quadruplex forming G-Rich Sequences (QGRS) in the significant enrichment genes in the **CP** group.

**Table S7.** The **CP** group had the highest proportion of G4 deletions in whole-genome sequencing.

**Table S8.** The Quadruplex forming G-Rich Sequences (QGRS) in the genes of which the expression was significantly regulated by **CP** in the RNA-seq studies.

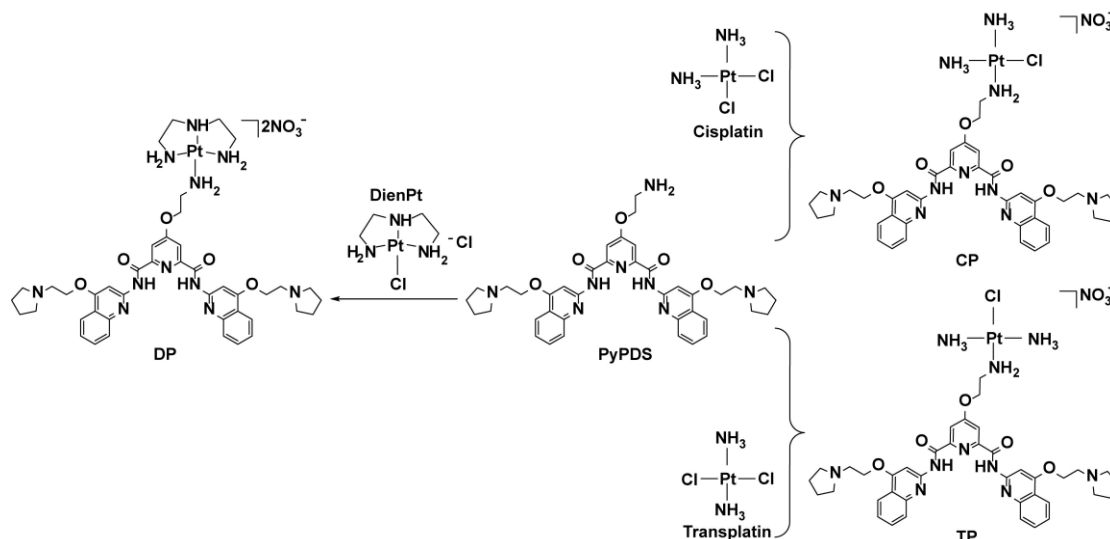

**Scheme S1.** The synthesis pathways of **CP**, **TP** and **DP**.

**Synthesis and Characterization.** As shown in Scheme S1, **PyPDS** was synthesized with reference to a previous study<sup>1</sup>.

The synthesis of cis- [Pt (NH<sub>3</sub>)<sub>2</sub>(PyPDS)Cl]NO<sub>3</sub> (**CP**), cisplatin (30.0 mg, 0.1 mmol, 1.0 eq.) and AgNO<sub>3</sub> (17 mg, 0.1 mmol, 1.0 eq.) were prepared in DMF (6 mL) under nitrogen protection at 35 °C in the dark and stirred for 12 h. After the reaction, the supernatant was filtered, **PyPDS** (70.0 mg, 0.1 mmol, 1.0 eq.) was added, and stirring was continued under nitrogen protection at 60 °C for 48 h in the dark. After cooling to room temperature, the samples were dried under vacuum and purified by HPLC to give the product (10.0 mg, yield 10%). ESI-MS (*m/z*): [**CP**+3H]<sup>3+</sup> calcd. for C<sub>39</sub>H<sub>52</sub>N<sub>10</sub>O<sub>5</sub>PtCl, 323.77; found: 323.78. [**CP**+2H]<sup>2+</sup> calcd. for C<sub>39</sub>H<sub>51</sub>N<sub>10</sub>O<sub>5</sub>PtCl, 485.16; found: 485.17. [**CP**+H]<sup>+</sup> calcd. for C<sub>39</sub>H<sub>50</sub>N<sub>10</sub>O<sub>5</sub>PtCl, 969.32; found: 969.33. <sup>1</sup>H NMR (400 MHz, DMSO-*d*<sub>6</sub>) δ 12.07 (s, 2H), 8.18 (d, *J* = 8.0 Hz, 2H), 8.17 (s, 2H), 8.12 (s, 2H), 7.97 (d, *J* = 4.0 Hz, 2H), 7.95 (d, *J* = 4.0 Hz, 2H), 7.79 (t, *J* = 8.0 Hz, 2H), 7.56 (t, *J* = 8.0 Hz, 2H), 4.51 – 4.56 (m, 3H), 4.50 (s, 2H), 4.47 (m, 4H), 4.41 (b, 3H), 3.99 (s, 2H), 3.21 (s, 4H), 2.83 (s, 8H), 1.79 (s, 8H). <sup>13</sup>C NMR (100 MHz, DMSO-*d*<sub>6</sub>) δ 167.25, 163.72, 162.46, 152.85, 151.56, 147.52, 131.15, 127.39, 125.25, 122.32, 119.66, 112.72, 95.52, 67.77, 63.55, 54.65, 54.07, 23.60.

Synthesis of trans- [Pt (NH<sub>3</sub>)<sub>2</sub>(PyPDS)Cl]NO<sub>3</sub> (**TP**): The synthesis method was the same as that for **CP**, except that the reactant replaced cisplatin with transplatin. [**TP**+3H]<sup>3+</sup> calcd. for C<sub>39</sub>H<sub>52</sub>N<sub>10</sub>O<sub>5</sub>PtCl, 323.77; found: 323.78. [**TP**+2H]<sup>2+</sup> calcd. for C<sub>39</sub>H<sub>51</sub>N<sub>10</sub>O<sub>5</sub>PtCl, 485.16; found:

485.17.  $[\text{TP}+\text{H}]^+$  calcd. for  $\text{C}_{39}\text{H}_{50}\text{N}_{10}\text{O}_5\text{PtCl}$ , 969.32; found: 969.33.  $^1\text{H}$  NMR (400 MHz,  $\text{DMSO}-d_6$ )  $\delta$  12.09 (s, 2H), 8.35 (s, 2H), 8.14 (s, 2H), 8.12 (s, 2H), 7.99 (s, 2H), 7.95 (d,  $J = 4.0$  Hz, 2H), 7.79 (t,  $J = 8.0$  Hz, 2H), 7.55 (t,  $J = 8.0$  Hz, 2H), 4.55 (s, 2H), 4.43 (t,  $J = 4.0$  Hz, 4H), 4.10 (s, 6H), 3.84 (b, 2H), 3.04 (t,  $J = 4.0$  Hz, 4H), 2.65 (s, 8H), 1.73 (s, 8H).  $^{13}\text{C}$  NMR (100 MHz,  $\text{DMSO}-d_6$ )  $\delta$  165.41, 163.73, 162.56, 152.91, 151.55, 147.52, 131.09, 127.40, 125.20, 122.22, 119.69, 112.76, 95.47, 68.49, 63.54, 54.68, 54.26, 23.72.

The synthesis of  $[\text{Pt}(\text{dien})(\text{PyPDS})](\text{NO}_3)_2$  (**DP**): DienPt-Cl (Dien = diethylenetriamine) was synthesized as described previously<sup>2</sup>. DienPt-Cl (37.0 mg, 0.1 mmol, 1.0 eq.) and  $\text{AgNO}_3$  (34.0 mg, 0.2 mmol, 2.0 eq.) were dissolved in 5 ml DMF. After the reaction was protected by nitrogen at room temperature for 12 h in the dark, the residue was filtered, and 5 ml of **PyPDS** (70.0 mg, 0.1 mmol, 70 mg) solution was dropped into it. The reaction was protected by nitrogen at 50 °C for 48 h in the dark, the reaction solution was filtered, the solid was washed three times with methanol, and the methanol solution was collected and dried. The product was freeze dried to obtain a pure product (10.0 mg, yield 10%).  $^1\text{H}$  NMR (400 MHz,  $\text{DMSO}-d_6$ )  $\delta$  12.09 (s, 2H), 8.18 (t,  $J = 8.0$  Hz, 2H), 8.13 (d,  $J = 4.0$  Hz, 2H), 8.09 (b, 2H), 8.00 (s, 2H), 7.95 (t,  $J = 8.0$  Hz, 2H), 7.80 (t,  $J = 8.0$  Hz, 2H), 7.56 (t,  $J = 8.0$  Hz, 2H), 5.68 (b, 2H), 5.51 (b, 2H), 4.51 (m, 6H), 3.59 (b, 2H), 3.10 (d,  $J = 4.0$  Hz, 2H), 2.91 (s, 8H), 2.68 (m, 8H), 1.81 (s, 8H).  $^{13}\text{C}$  NMR (100 MHz,  $\text{DMSO}-d_6$ )  $\delta$  170.44, 164.62, 161.71, 152.84, 150.53, 148.07, 131.17, 127.38, 125.27, 122.38, 119.63, 112.50, 95.52, 54.59, 53.45, 50.83, 45.62, 19.98.

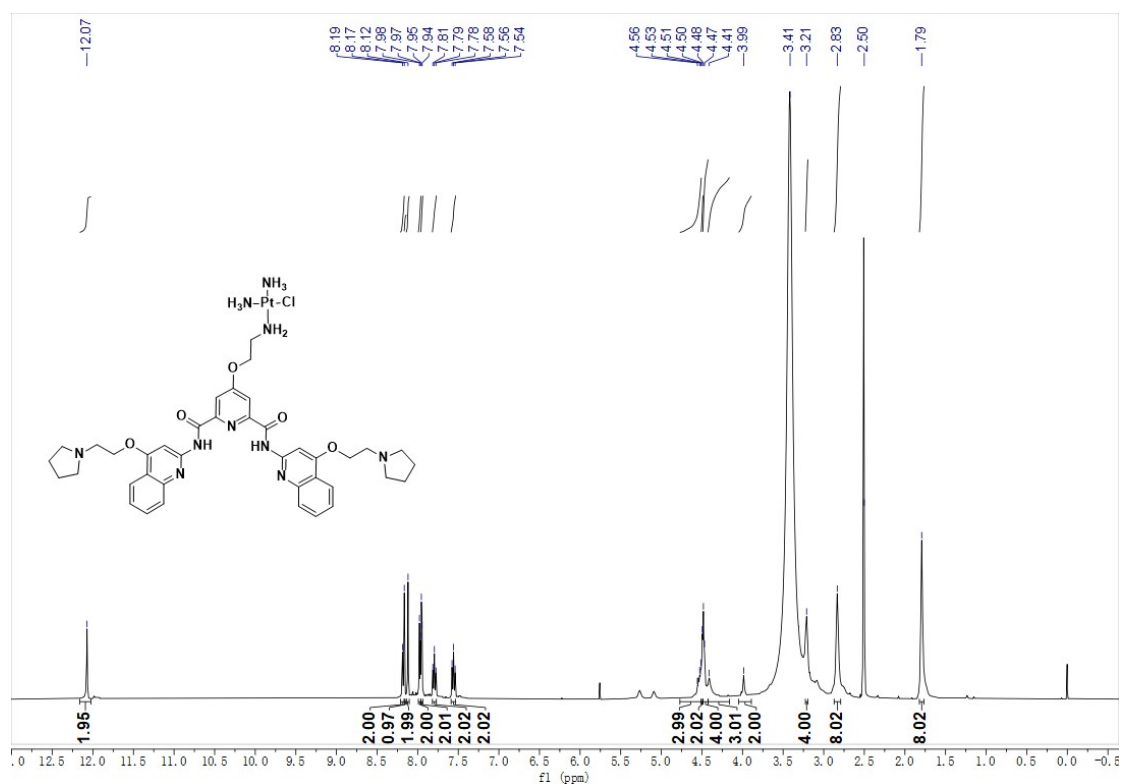

Fig. S1 <sup>1</sup>H NMR spectrum of CP in DMSO-*d*<sub>6</sub> at 25 °C.

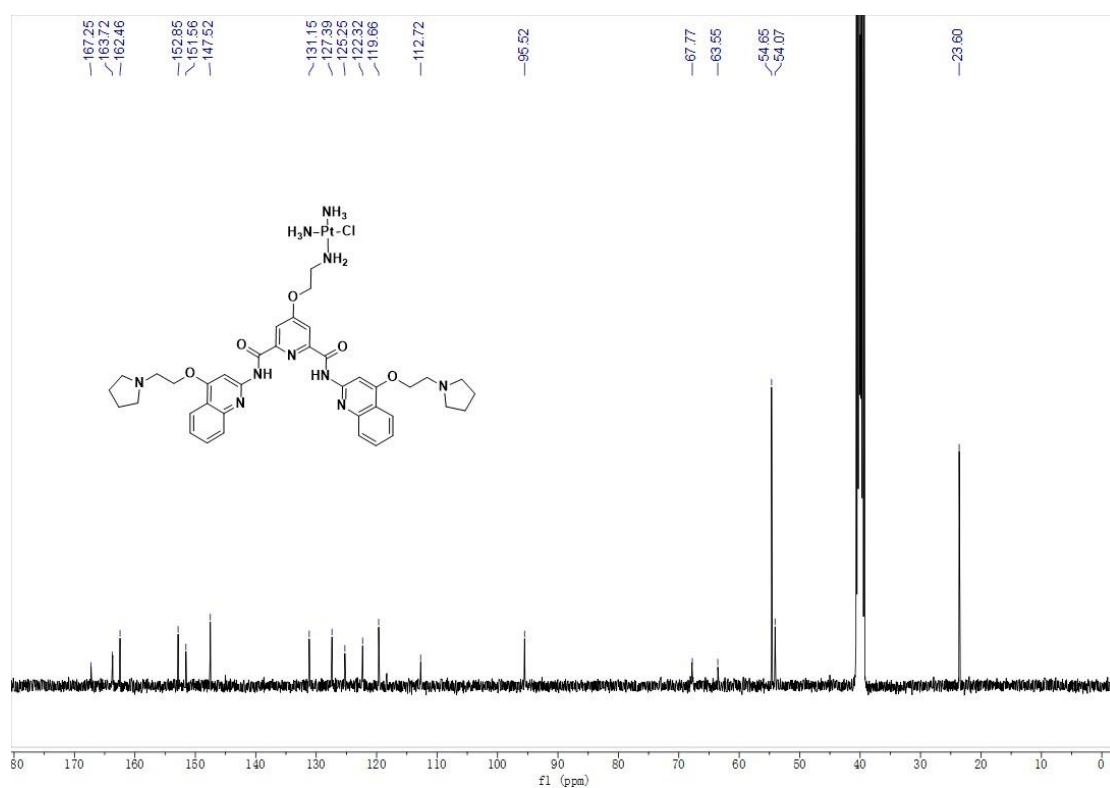

Fig. S2 <sup>13</sup>C NMR spectrum of CP in DMSO-*d*<sub>6</sub> at 25 °C.

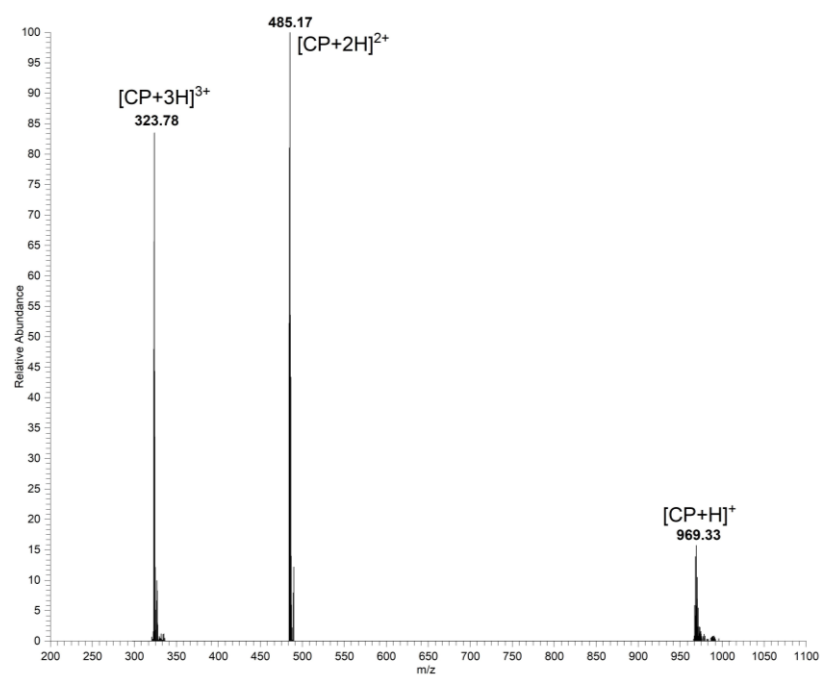

Fig. S3 Mass spectrum of CP.

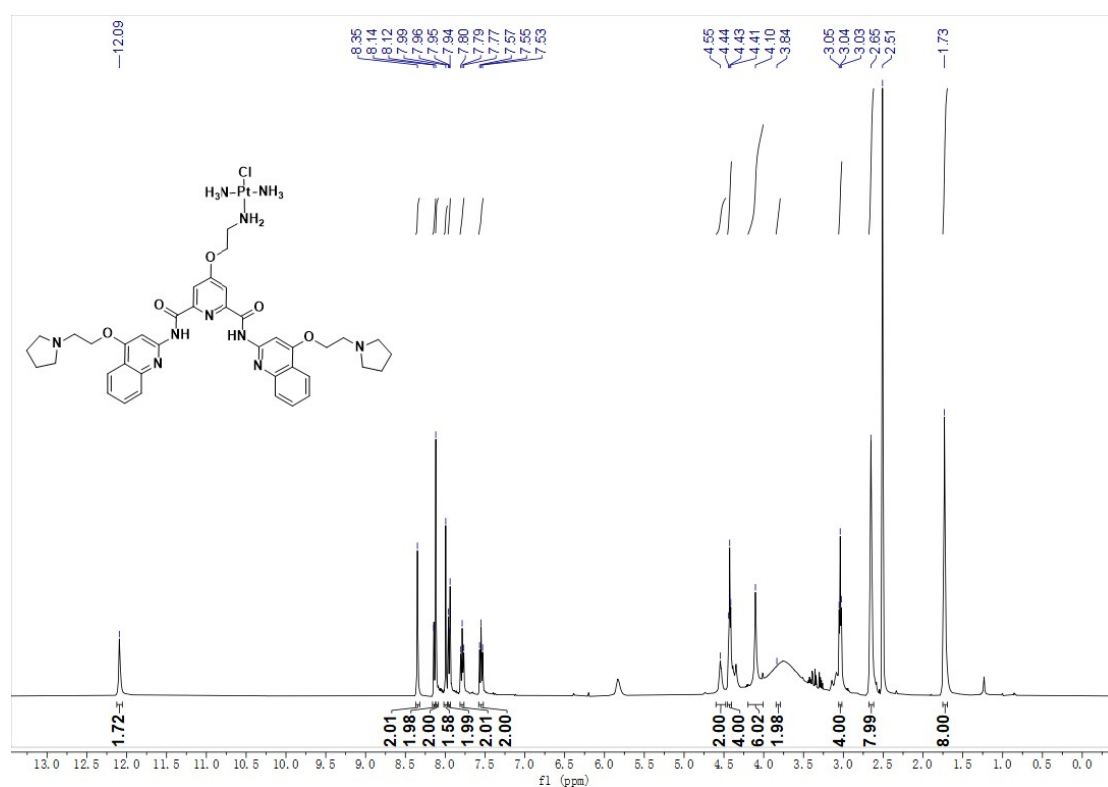

Fig. S4  $^1\text{H}$  NMR spectrum of TP in  $\text{DMSO}-d_6$  at  $25^\circ\text{C}$ .



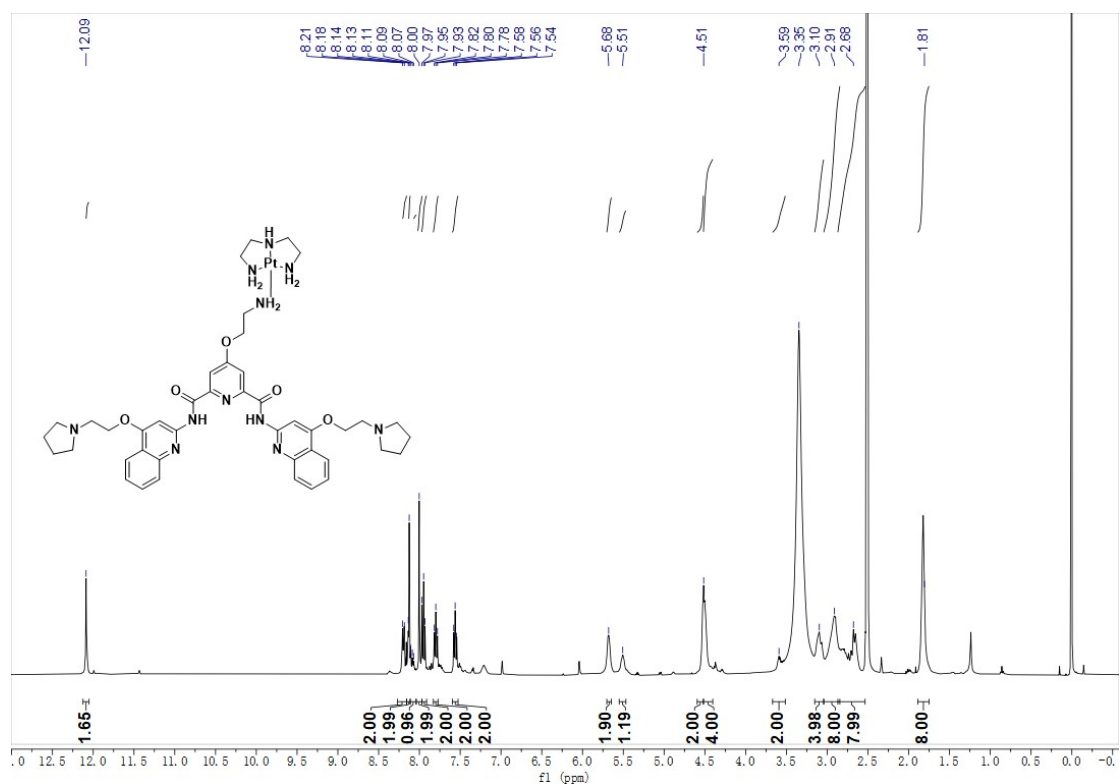

Fig. S7 <sup>1</sup>H NMR spectrum of DP in DMSO-*d*<sub>6</sub> at 25 °C.

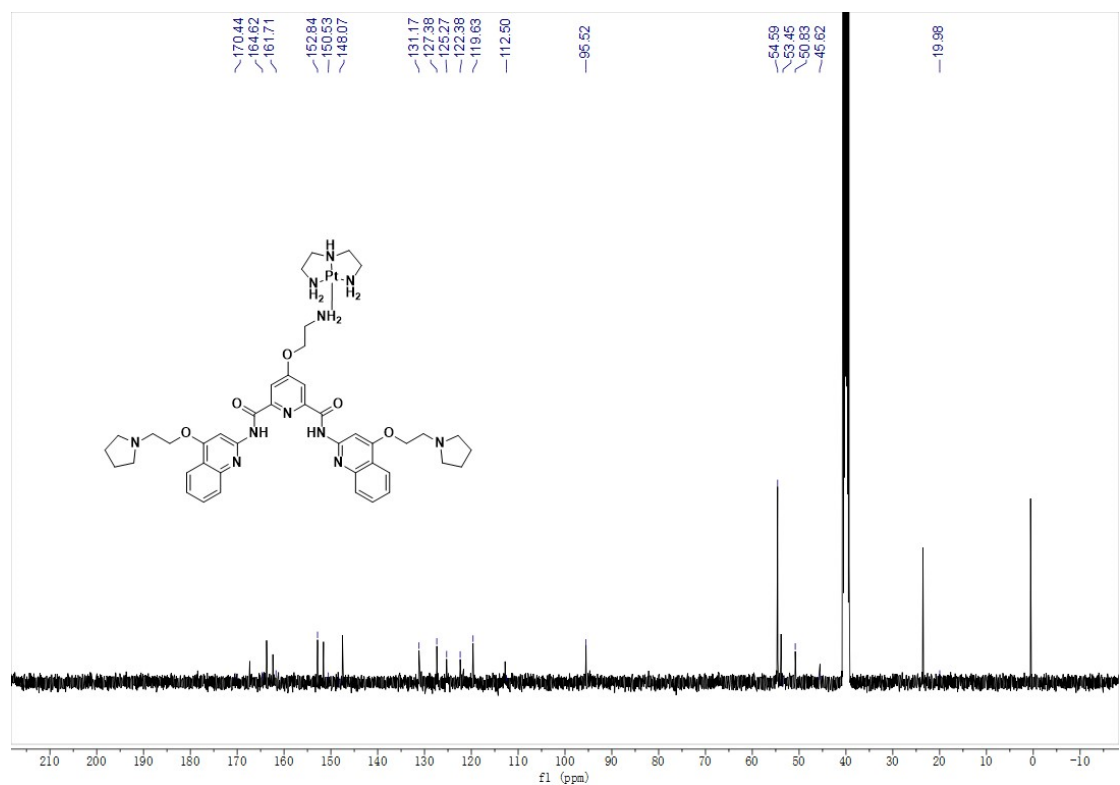

Fig. S8 <sup>13</sup>C NMR spectrum of DP in DMSO-*d*<sub>6</sub> at 25 °C.

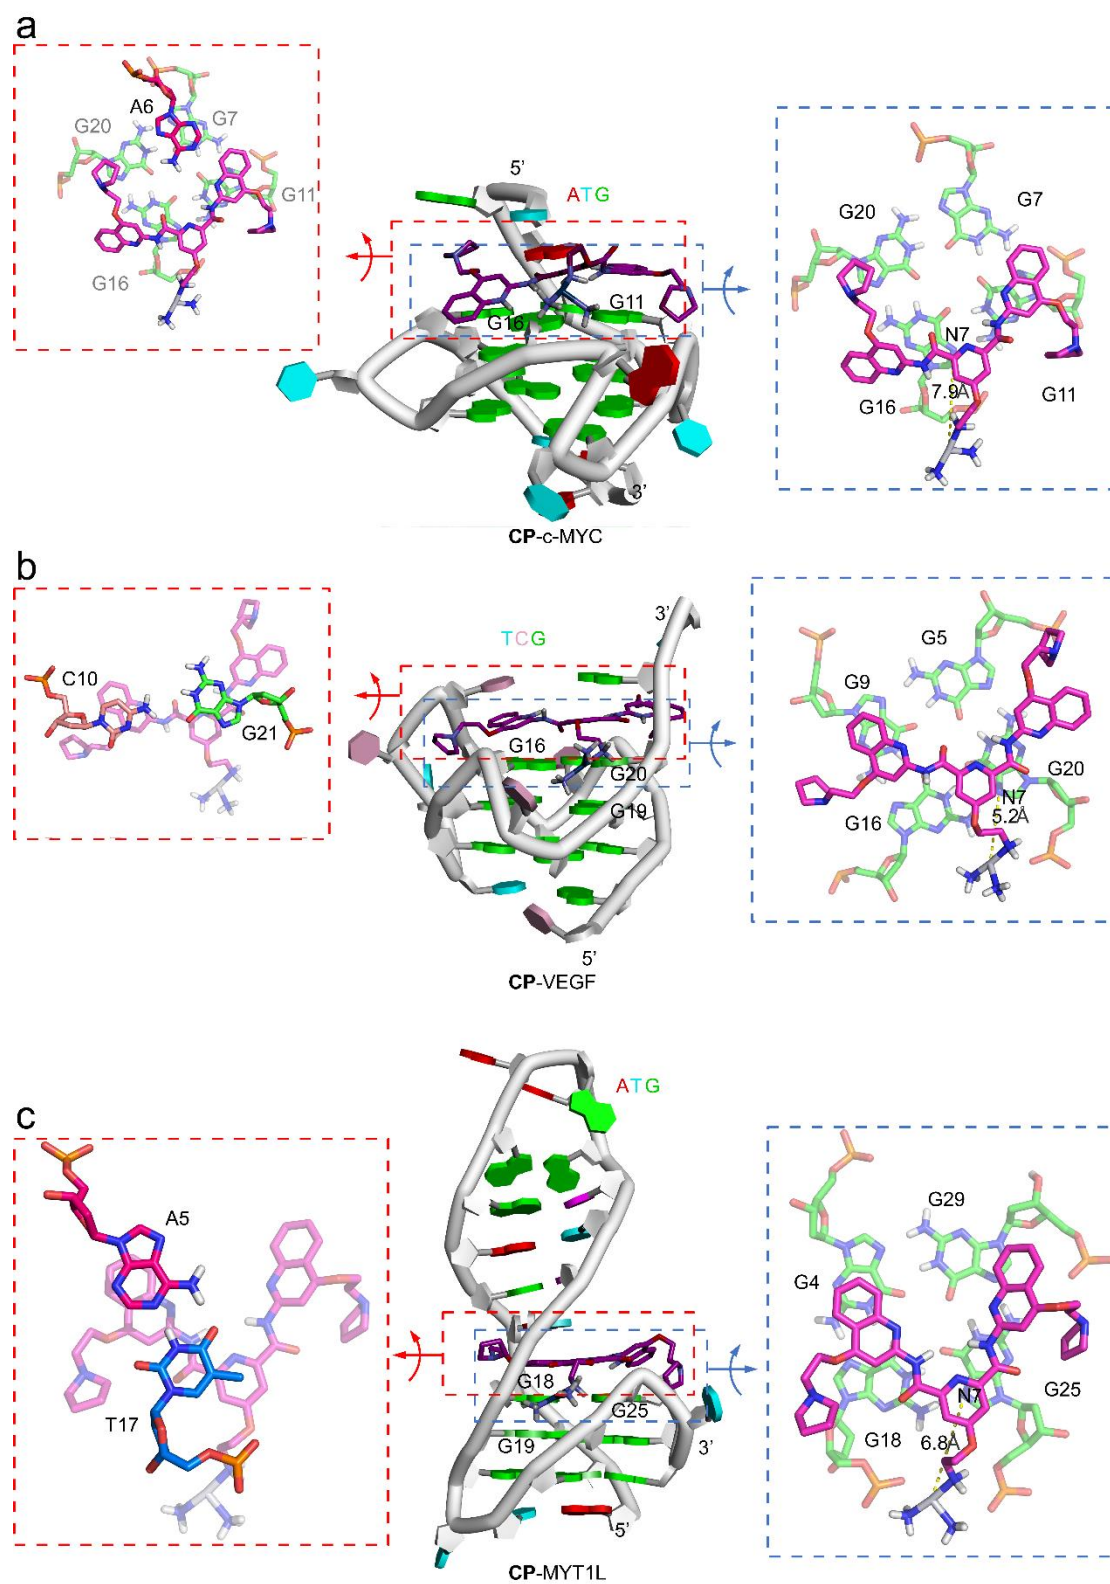

**Fig. S9** Representative structures of the 1:1 CP with c-MYC, VEGF and MYT1L G4 complexes.

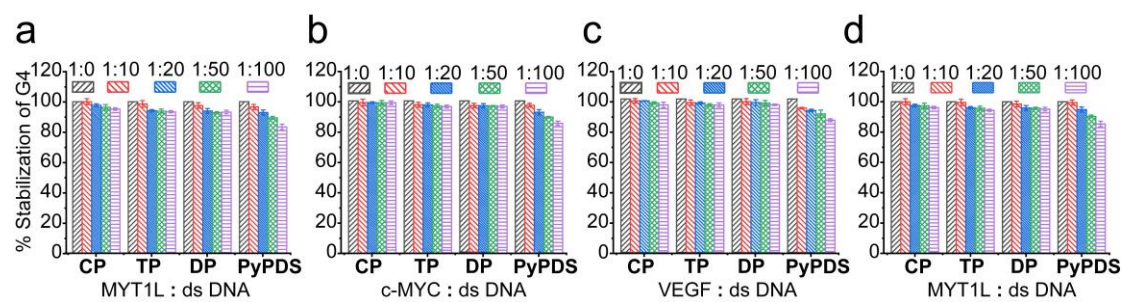

**Fig. S10** (a) Thermal stabilization of MYT1L G4 with **CP**, **TP**, **DP** and **PyPDS** while competing with increasing ratios of ds-12CT for binding to ligands. After mixing the compound and DNA, the samples were tested immediately. (b-d) Thermal stabilization of c-MYC, VEGF and MYT1L G4s after 48 h interacting with **CP**, **TP**, **DP** and **PyPDS** while competing with increasing ratios of dsDNA for binding to ligands. “G4”, meaning “c-MYC, VEGF and MYT1L”, and “dsDNA”, meaning “ds-12CT DNA”.

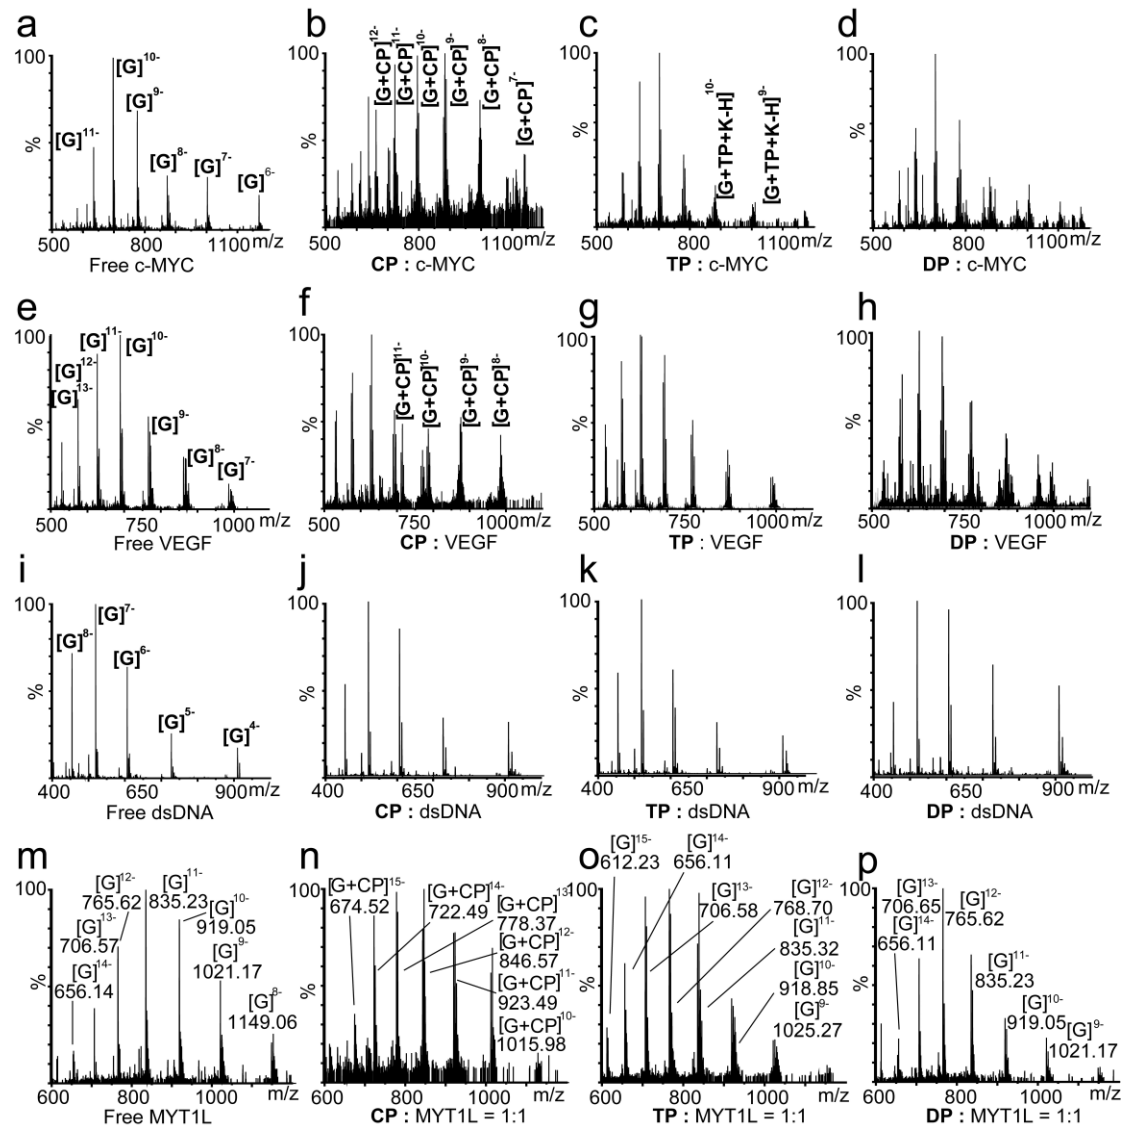

**Fig. S11** (a-p) ESI-MS of c-MYC, VEGF, MYT1L G4s and dsDNA interacting with **CP**, **TP** and **DP**. The peaks are labeled with “G”, meaning “c-MYC, VEGF and MYT1L”, and “dsDNA”, meaning “ds-12CT DNA”. **CP**, **TP** and **DP**: G = 1: 1.

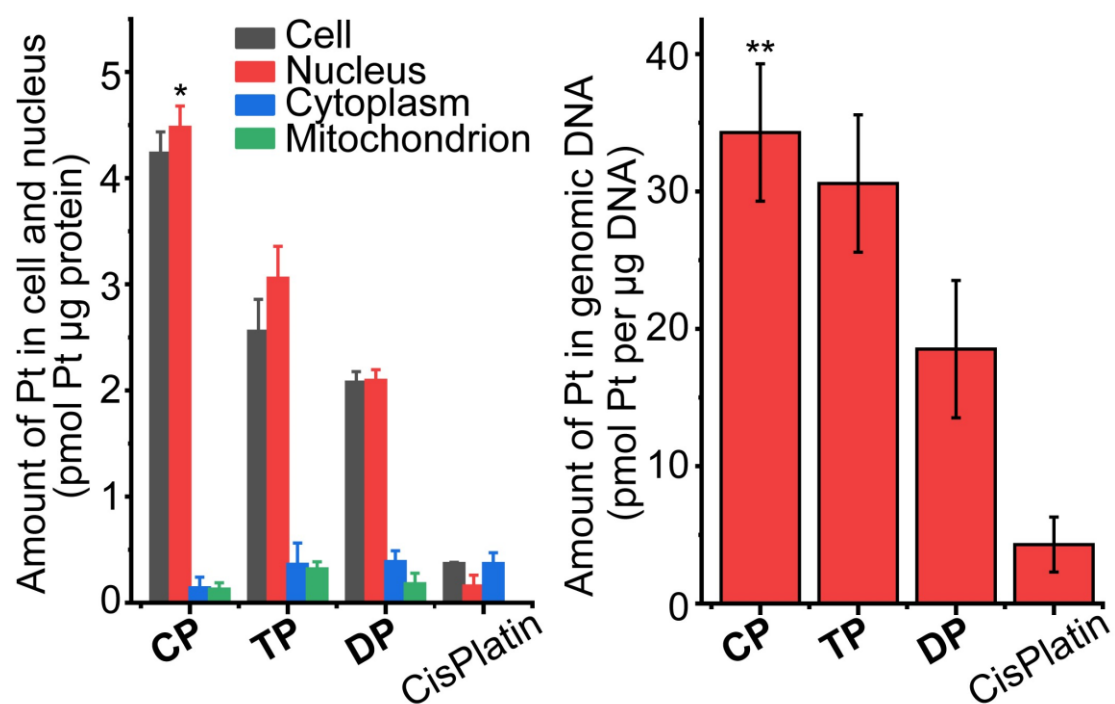

**Fig. S12** The amount of Pt in cell, nucleus and the amount of Pt in the genomic DNA of MDA-MB-231 cells after treated with different concentrations of **CP**, **TP** and **DP** for 24 h. Compound incubation concentration **CP**: 3  $\mu$ M, **TP**: 3  $\mu$ M, **DP**: 6  $\mu$ M and **PyPDS**: 6  $\mu$ M. Errors are s.d. ( $n \geq 3$ ). \* $p < 0.05$ , \*\* $p < 0.01$ .

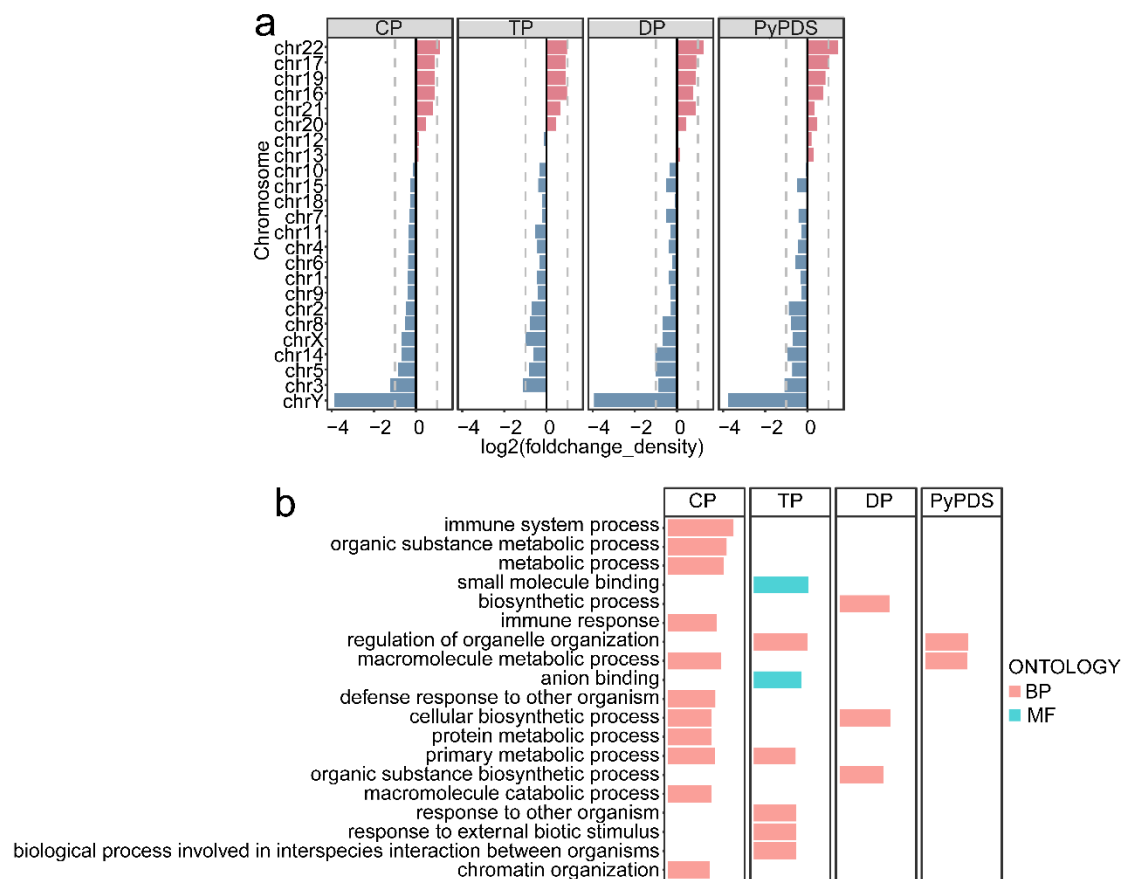

**Fig. S13** Distribution on chromosomes and GO enrichment of target gene.

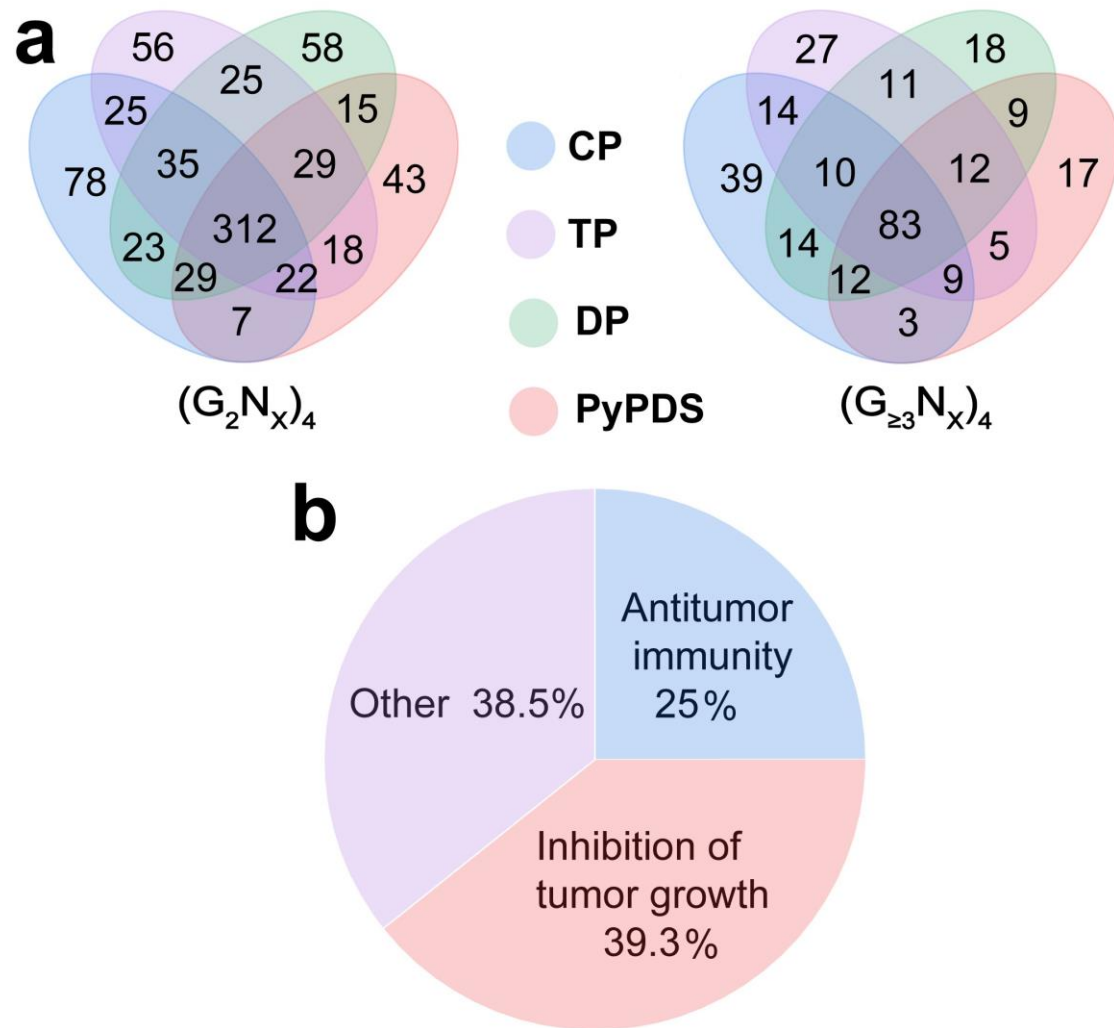

**Fig. S14** (a) Venn diagram of the effects of compounds on genes. (b) Pie chart of the proportion of G4 deletions in whole-genome sequencing in the **CP** group.

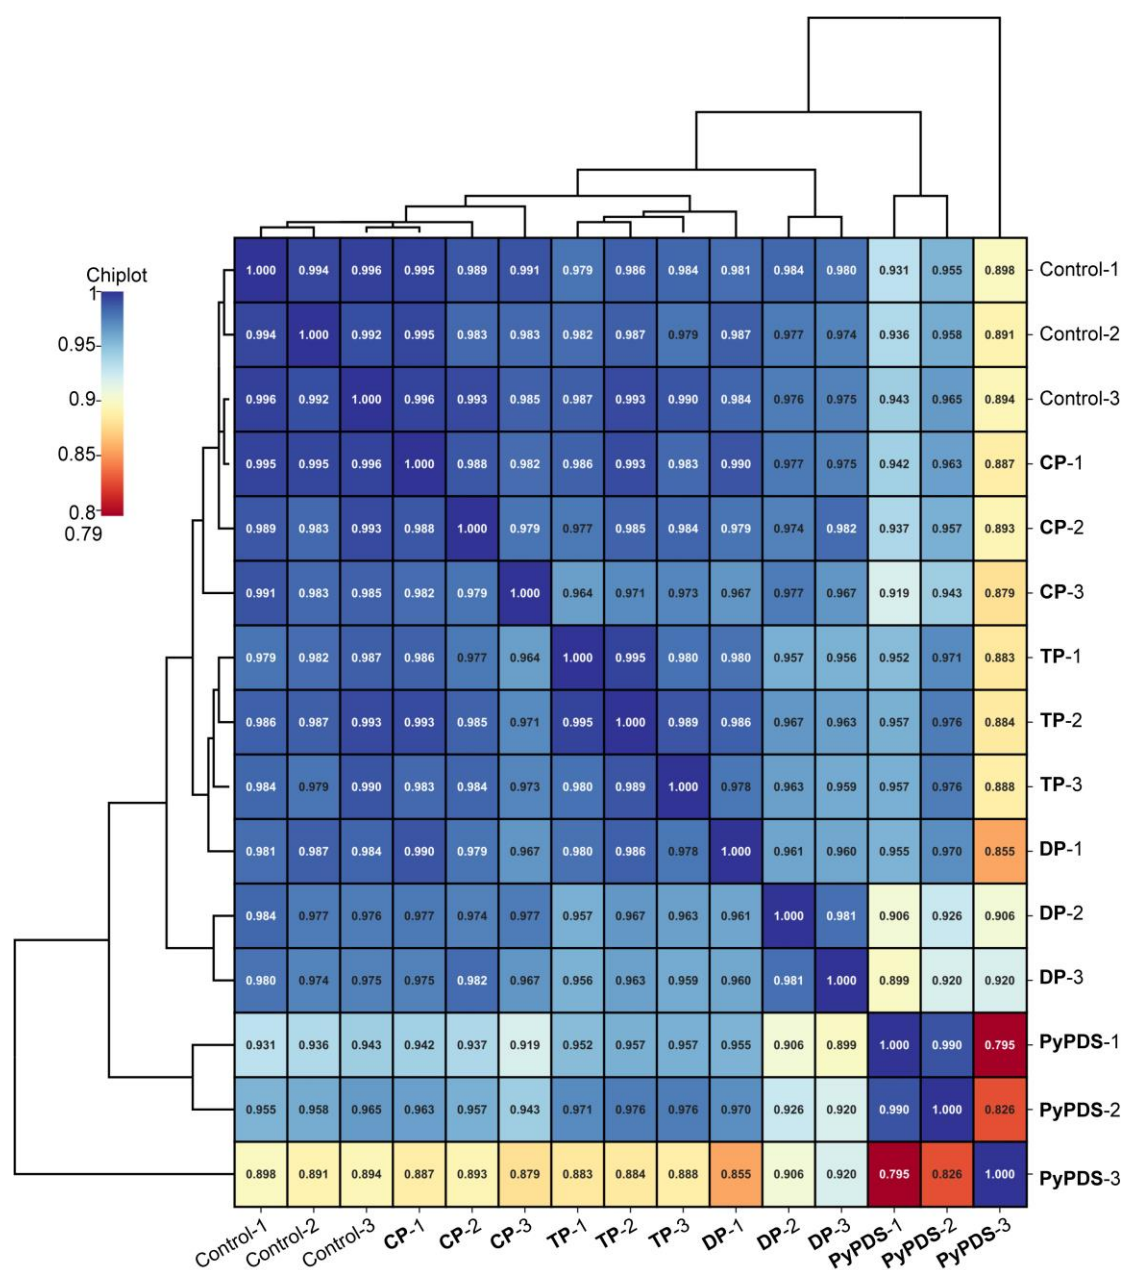

**Fig. S15** Heatmap diagram of Pearson correlation coefficients between the RNA-seq samples. Cell samples were treating with **CP**, **TP**, **DP**, and **PyPDS**, respectively, and the reproducibility of the data was confirmed by correlation coefficients (above 0.80) between parallel samples.

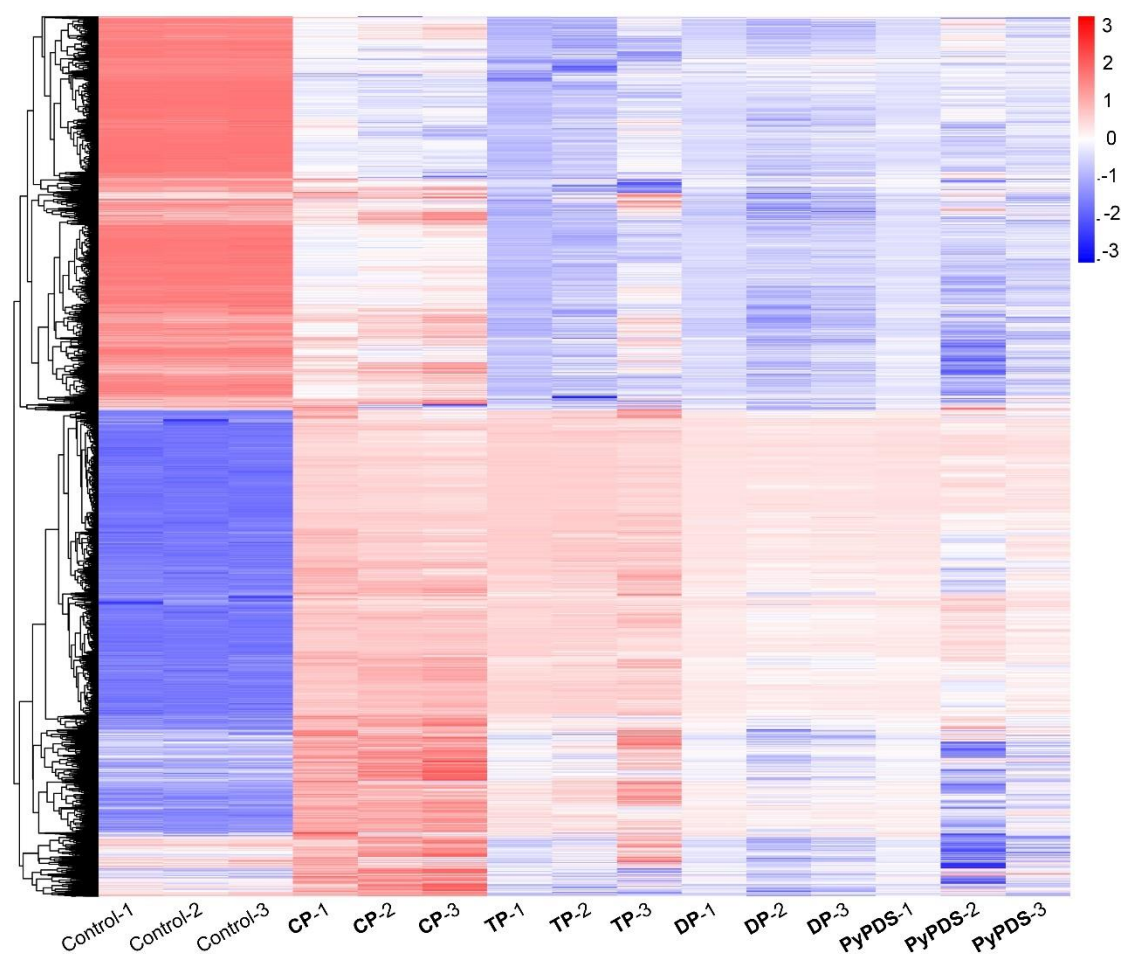

**Fig. S16** Cluster analysis and Heatmap displayed the overview of the differentially expressed genes (DEGs) induced by **CP**, **TP**, **DP** and **PyPDS** for 24 h. RNA-seq clustering heatmaps showed that the expression patterns of transcription treatment groups of **CP** and **TP** were similar, but different from those of **DP** and **PyPDS** groups, indicating that the cellular response mechanisms of **CP** and **TP** group transcription were comparable.

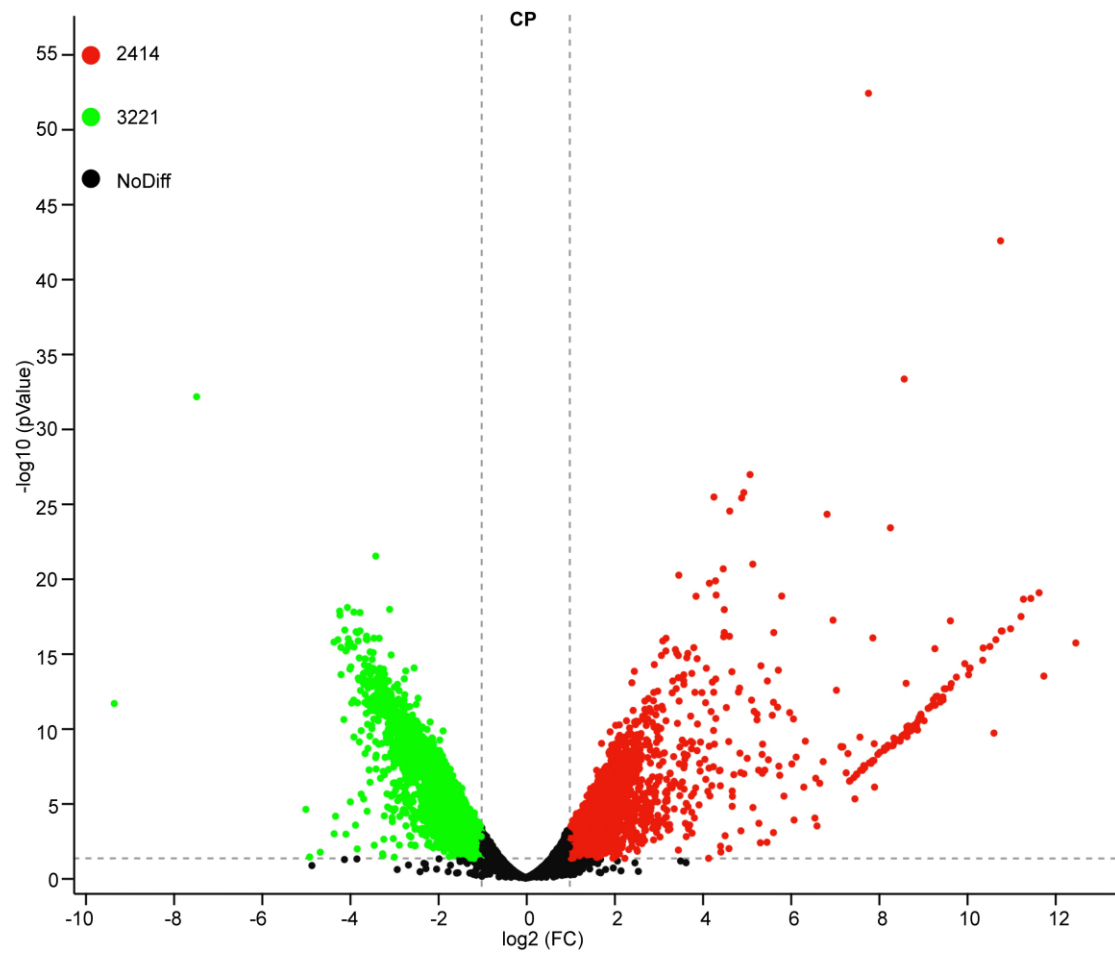

**Fig. S17** Volcano plots showing the DEGs in MDA-MB-231 cells treated with **CP** for 24 h.

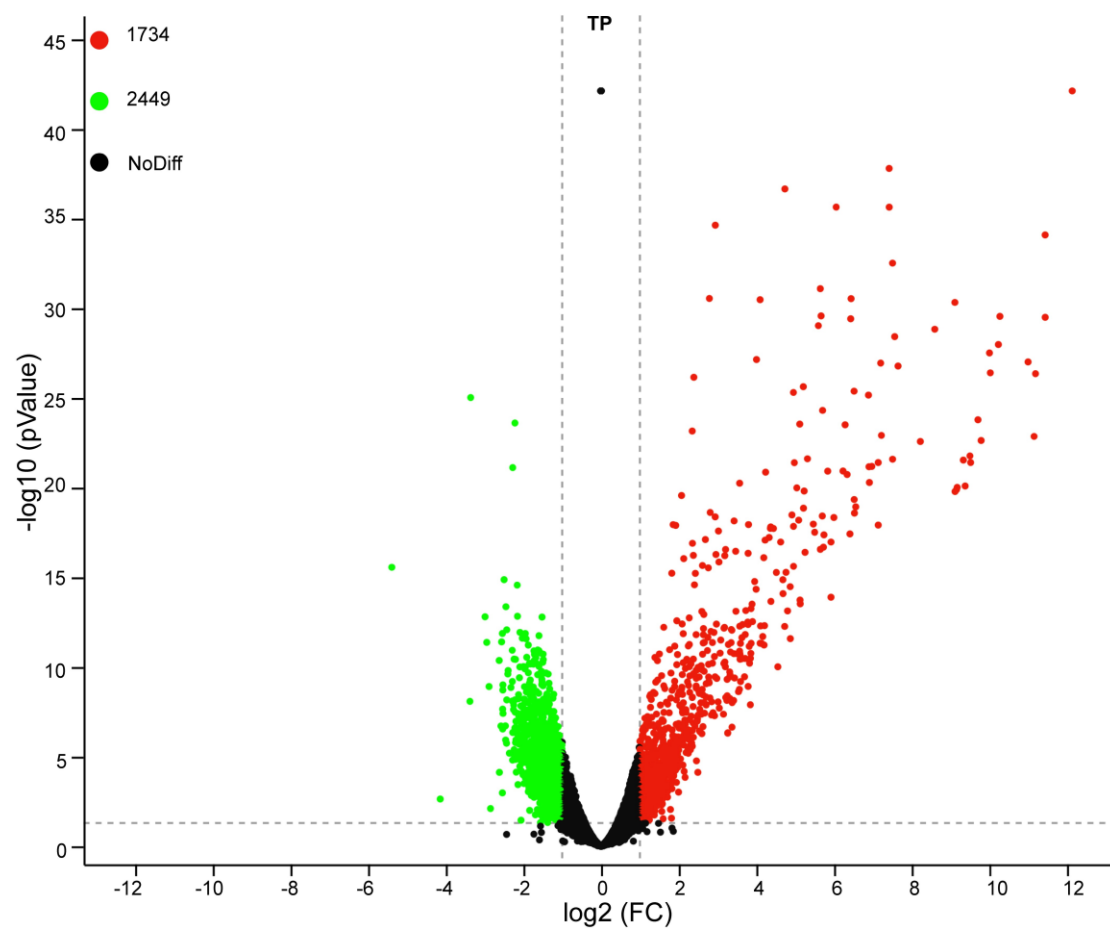

**Fig. S18** Volcano plots showing the DEGs in MDA-MB-231 cells treated with **TP** for 24 h.

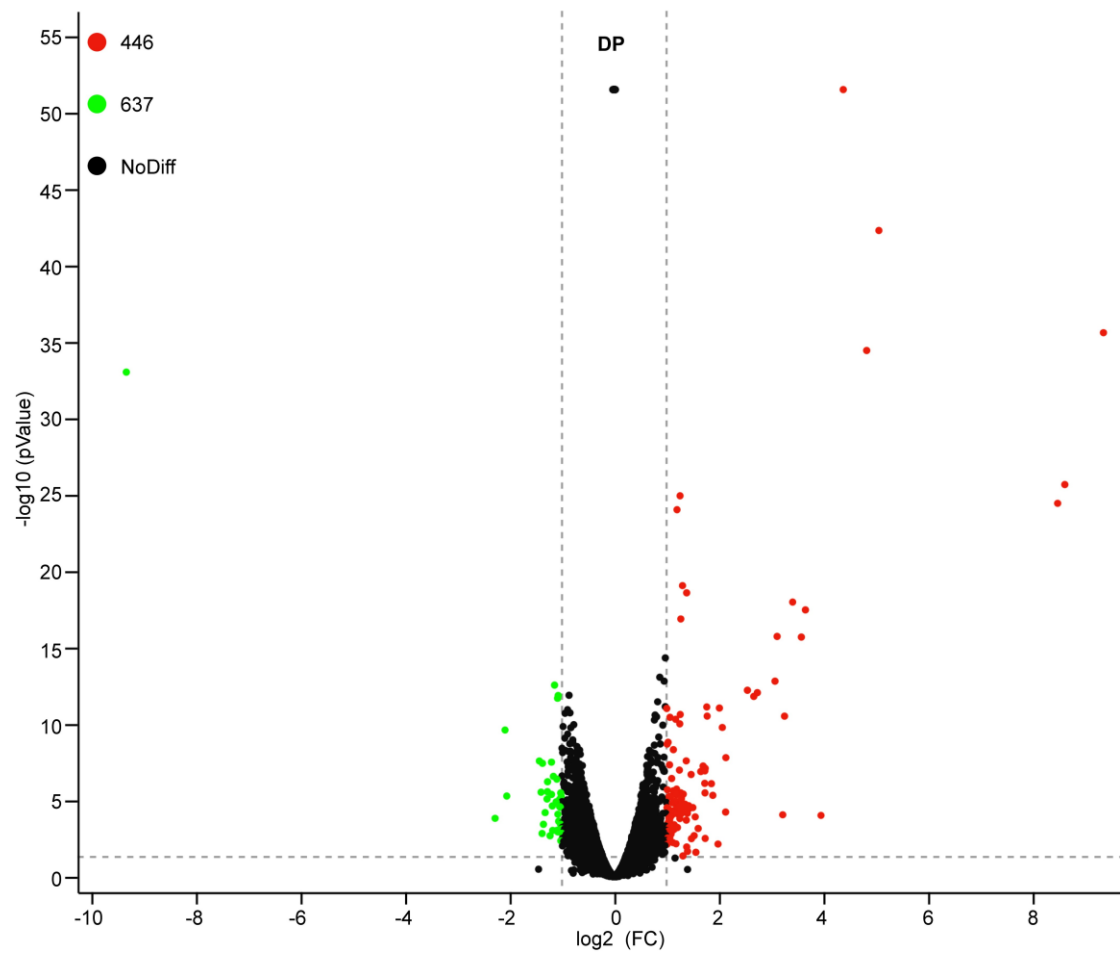

**Fig. S19** Volcano plots showing the DEGs in MDA-MB-231 cells treated with **DP** for 24 h.

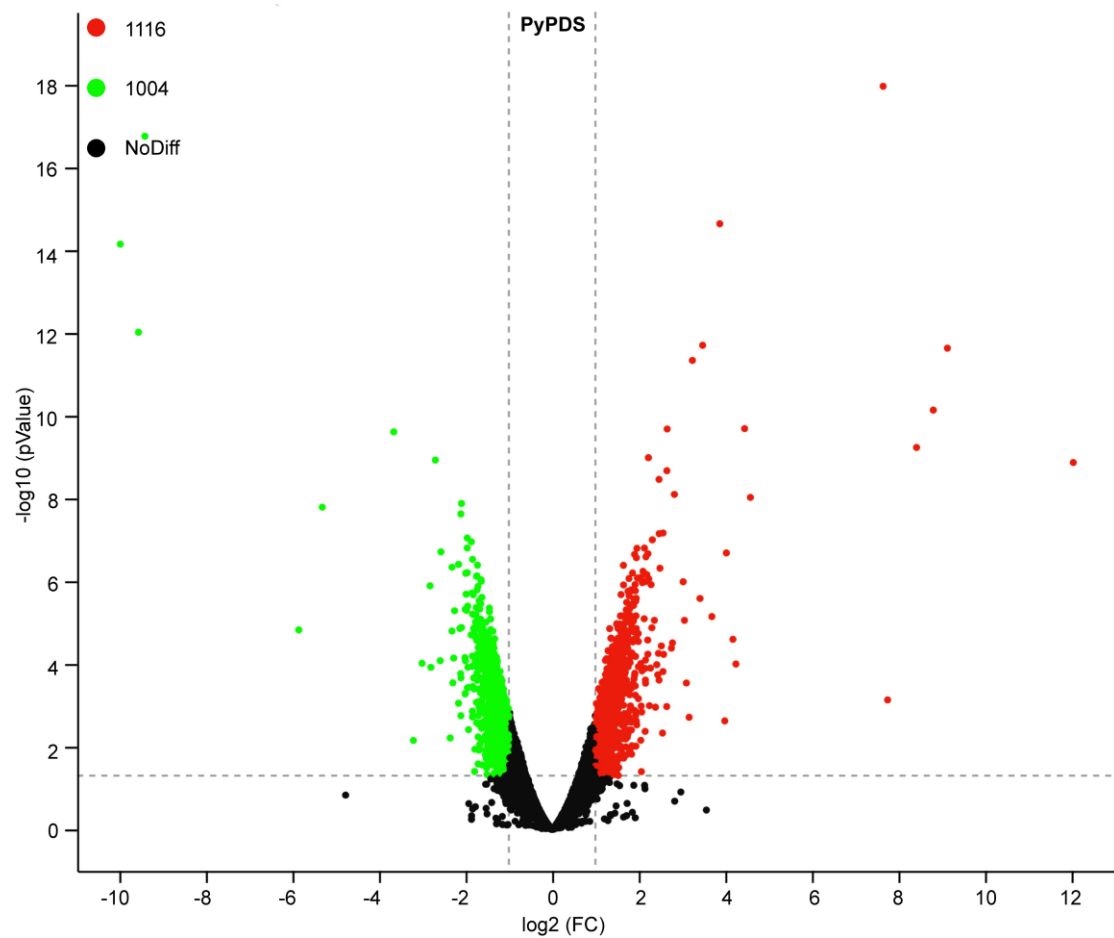

**Fig. S20** Volcano plots showing the DEGs in MDA-MB-231 cells treated with **PyPDS** for 24 h.

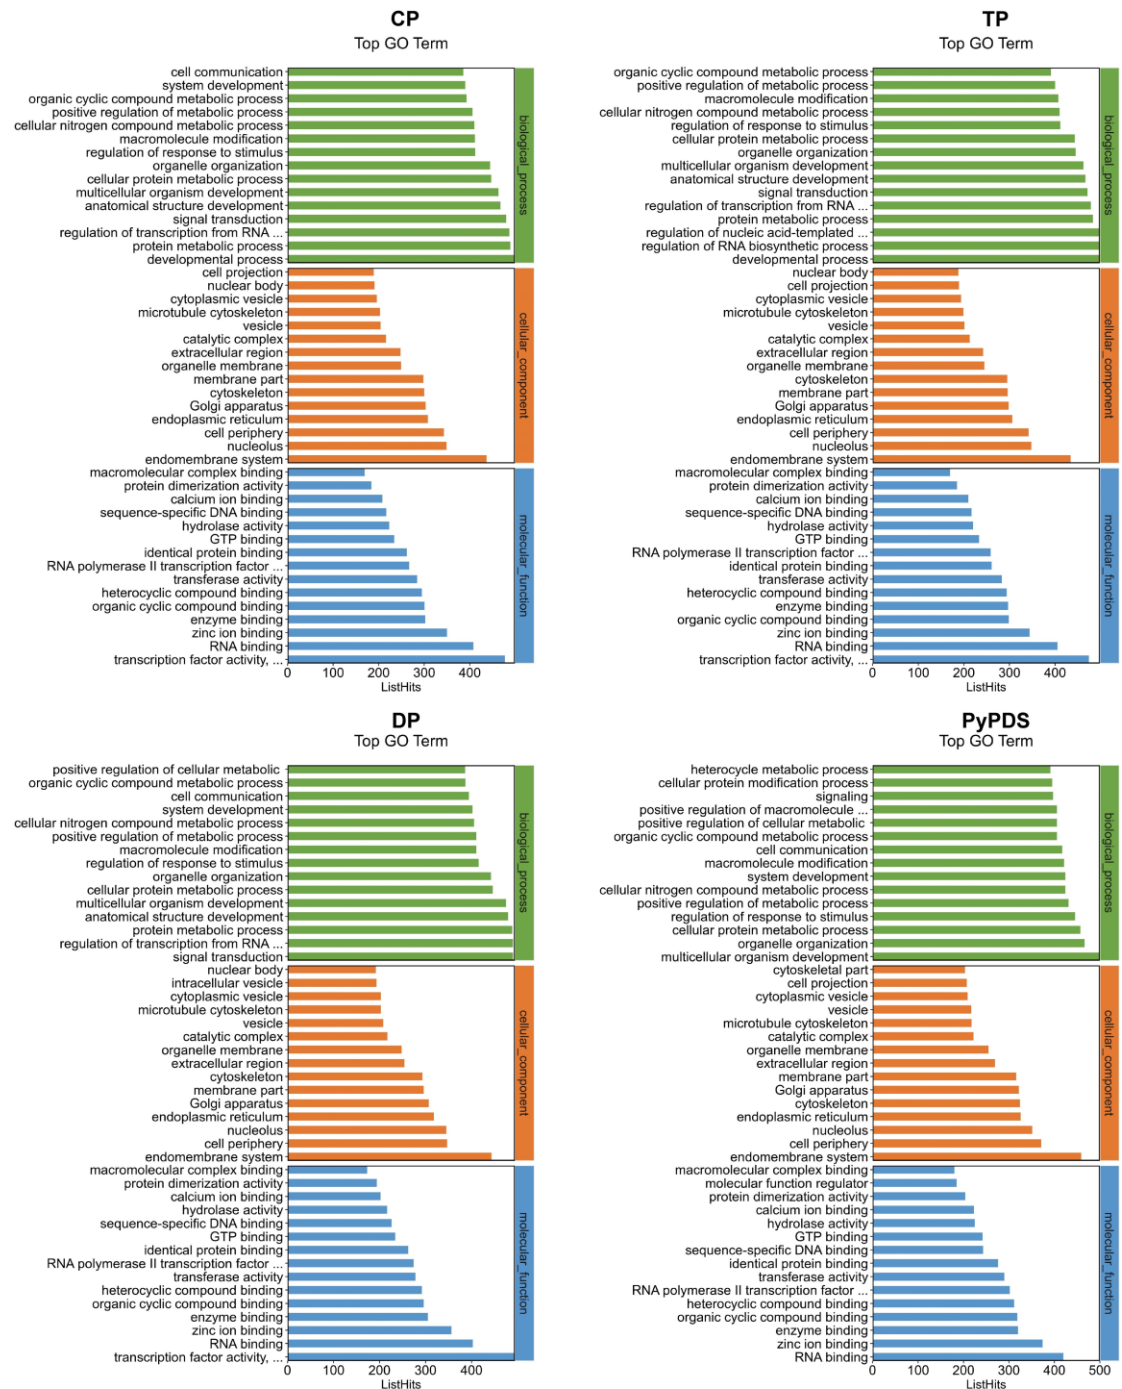

**Fig. S21** GO enrichment analysis of DEGs.

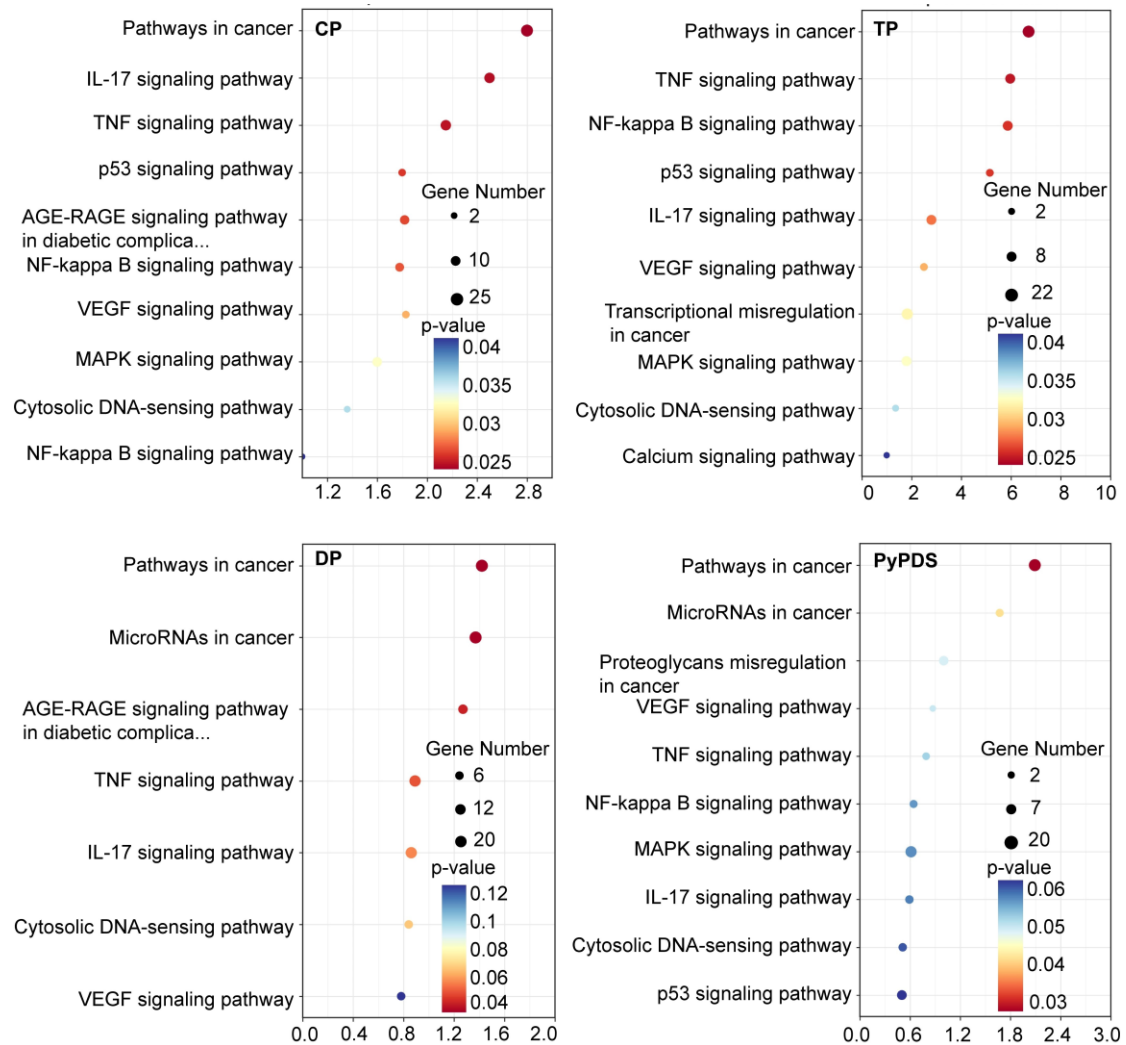

**Fig. S22** KEGG enrichment analysis of differentially expressed genes after **CP**, **TP**, **DP** and **PyPDS** treated for 24 h. KEGG enrichment analysis of RNA-seq revealed that **CP**, **TP**, **DP**, and **PyPDS** mainly affected pathways in cancer, cytosolic DNA-sensing, and immunity.

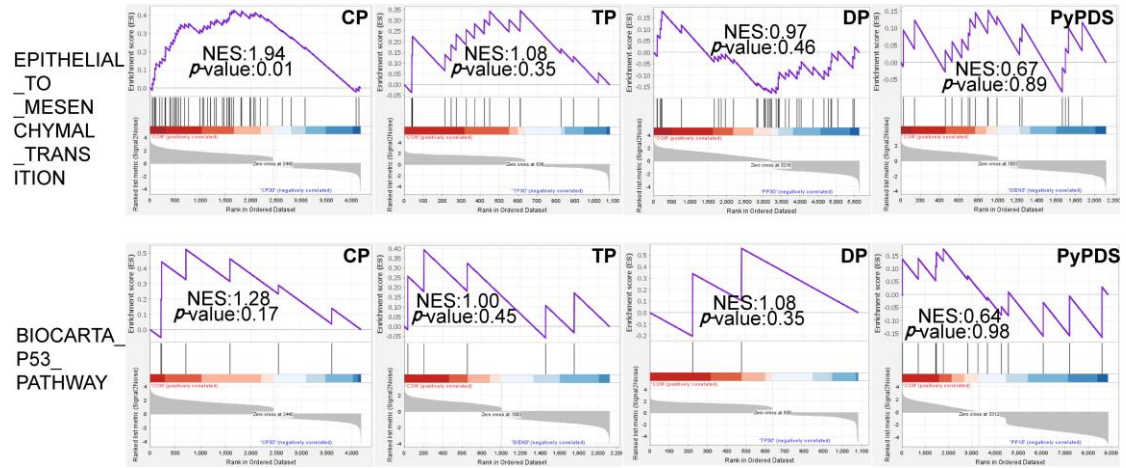

**Fig. S23** GSEA reveals positive enrichment of genes altered in cells subjected after CP, TP, DP and PyPDS treated.

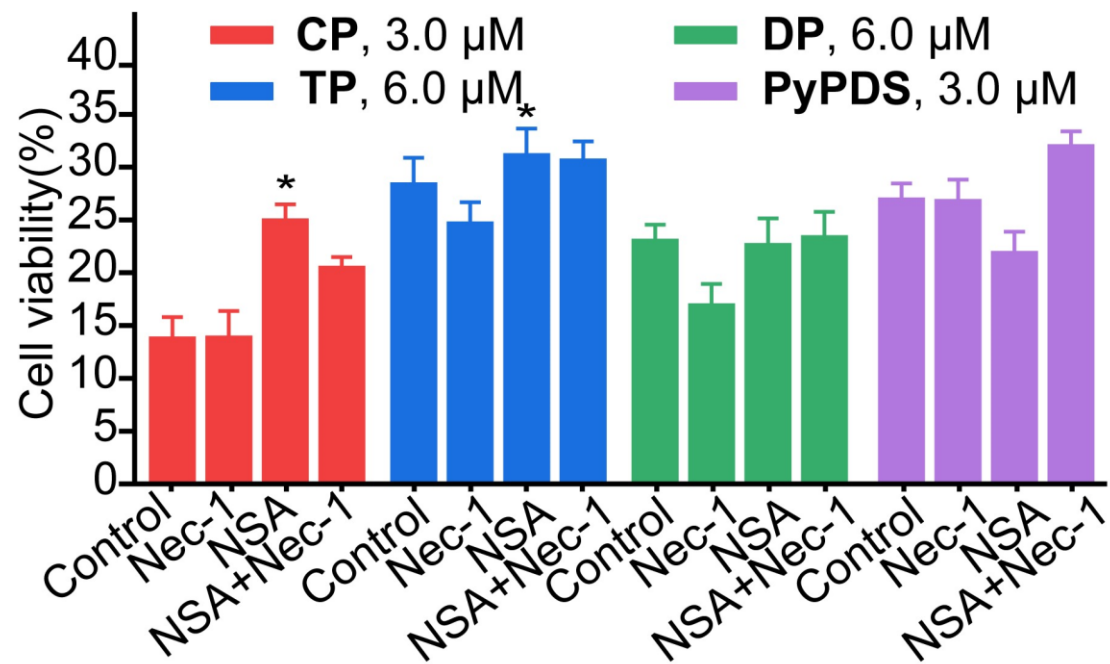

**Fig. S24** The impact of different inhibitors on cell death induced by compounds. Cells were pretreated with the inhibitors (Nec-1: 100  $\mu$ M; NSA: 10  $\mu$ M) for 1 h and then subjected to compound treatment. Errors are s.d. ( $n \geq 3$ ). \* $p < 0.05$ .

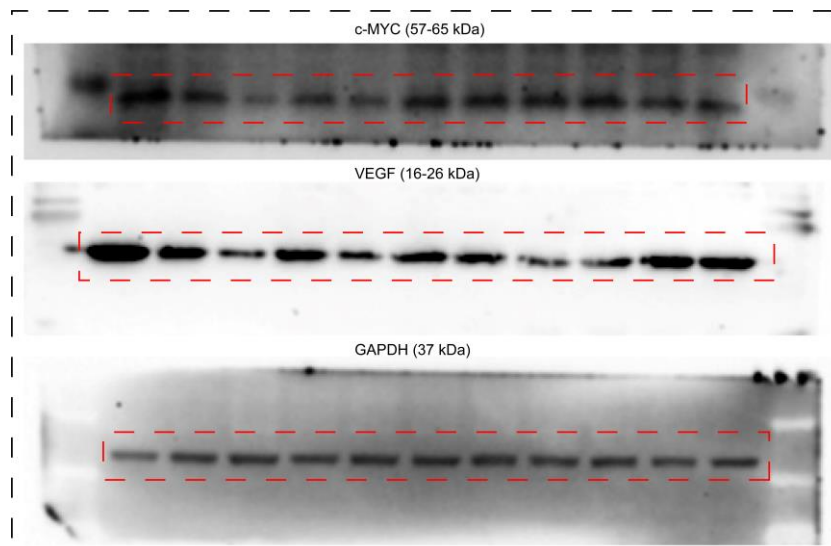

**Fig. S25** Un-cropped western blotting images of Figure 2f.

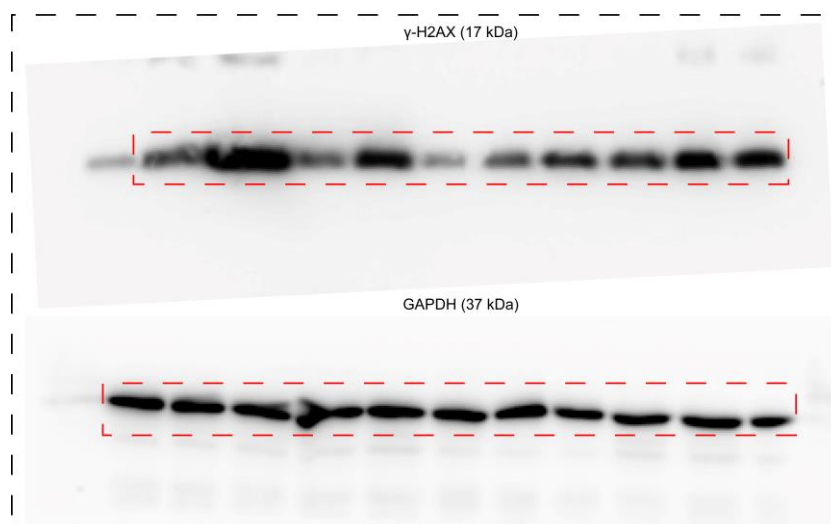

**Fig. S26** Un-cropped western blotting images of Figure 3g.

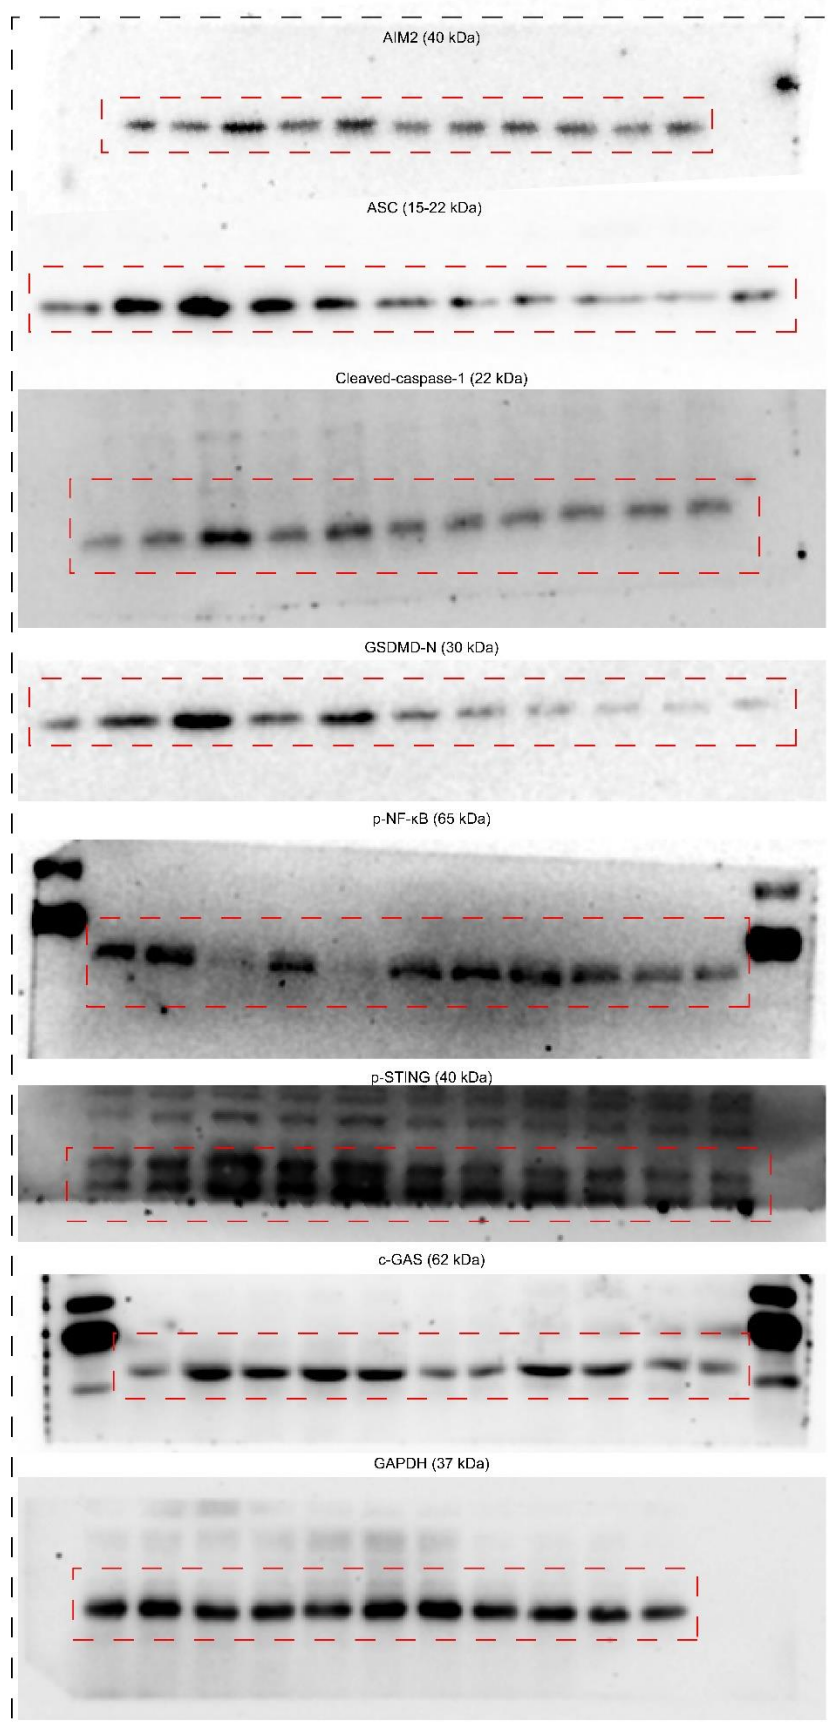

**Fig. S27** Un-cropped western blotting images of Figure 4g.

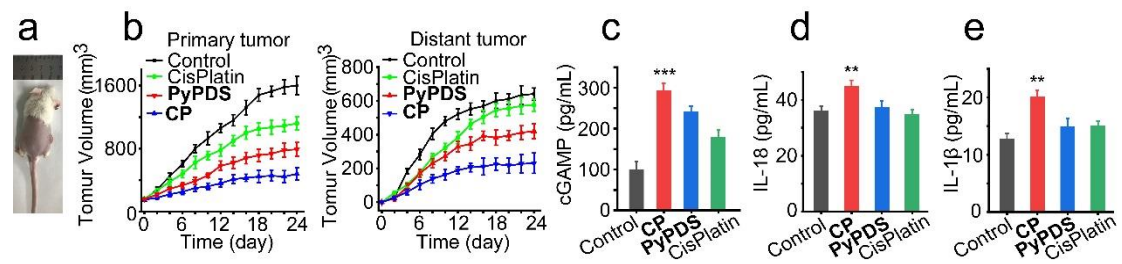

**Fig. S28** (a) Representative photographs of mice in the CP group at 24 days before sacrifice. (b) Volume changes of primary and distant tumors (n=4). Errors are s.d. (n≥3). (c-e) the secretion of cytokines (cGAMP, IL-18 and IL-1β) in serum on Day 16. \*\*p<0.01, \*\*\*p<0.001.

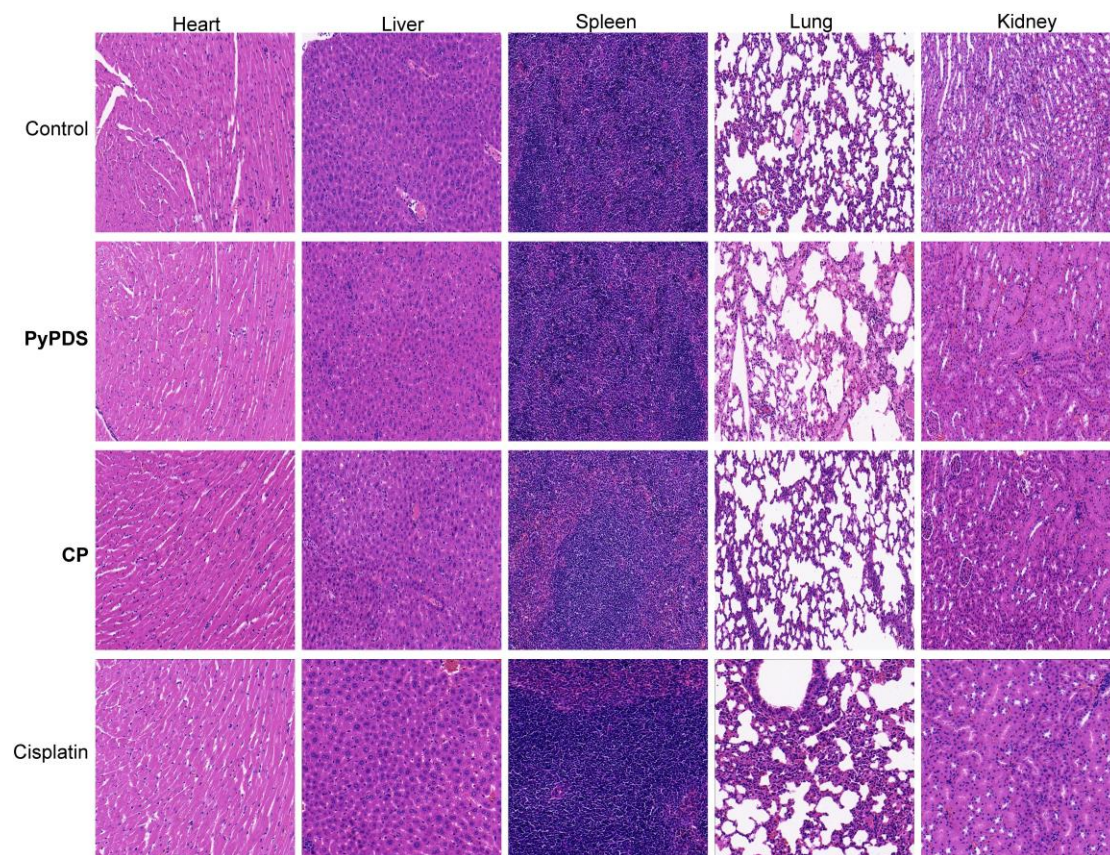

**Fig. S29** Hematoxylin and eosin (H&E) staining of the main organs from mice with different treatment.

**Table S1** The representative docked free energies of the docking models between **CP** and c-MYC G4 DNA.

| Number of AutoDock clusters a | Docked free energy range of docked structures (kcal/mol) | Cluster rank b | Docked free energy (kcal/mol) |
|-------------------------------|----------------------------------------------------------|----------------|-------------------------------|
| 39(100)                       | -10.67 to -4.64                                          | 1              | -10.67                        |
|                               |                                                          | 2              | -10.27                        |
|                               |                                                          | 3              | -10.22                        |
|                               |                                                          | 4              | -10.08                        |
|                               |                                                          | 5              | -10.04                        |
|                               |                                                          | 6              | -10.01                        |
|                               |                                                          | 7              | -9.79                         |
|                               |                                                          | 8              | -9.74                         |
|                               |                                                          | 9              | -9.53                         |
|                               |                                                          | 10             | -9.48                         |

a. Number of GA runs are shown in parentheses. B. The cluster rank is the absolute ranking as determined by the docked free energy defined by AutoDock.

**Table S2** The representative docked free energies of the docking models between **CP** and VEGF G4 DNA.

| Number of AutoDock clusters a | Docked free energy range of docked structures (kcal/mol) | Cluster rank b | Docked free energy (kcal/mol) |
|-------------------------------|----------------------------------------------------------|----------------|-------------------------------|
| 66 (100)                      | -11.51 to -5.06                                          | 1              | -11.51                        |
|                               |                                                          | 2              | -10.99                        |
|                               |                                                          | 3              | -10.82                        |
|                               |                                                          | 4              | -10.00                        |
|                               |                                                          | 5              | -9.84                         |
|                               |                                                          | 6              | -9.77                         |
|                               |                                                          | 7              | -9.69                         |
|                               |                                                          | 8              | -9.60                         |
|                               |                                                          | 9              | -9.01                         |
|                               |                                                          | 10             | -8.89                         |

a. Number of GA runs are shown in parentheses. b. The cluster rank is the absolute ranking as determined by the docked free energy defined by AutoDock.

**Table S3** The representative docked free energies of the docking models between CP and MYT1L G4 DNA.

| Number of AutoDock clusters a | Docked free energy range of docked structures (kcal/mol) | Cluster rank b | Docked free energy (kcal/mol) |
|-------------------------------|----------------------------------------------------------|----------------|-------------------------------|
| 85 (100)                      | -15.50 to -6.7                                           | 1              | -15.50                        |
|                               |                                                          | 2              | -14.10                        |
|                               |                                                          | 3              | -14.00                        |
|                               |                                                          | 4              | -13.73                        |
|                               |                                                          | 5              | -13.67                        |
|                               |                                                          | 6              | -13.08                        |
|                               |                                                          | 7              | -12.92                        |
|                               |                                                          | 8              | -12.91                        |
|                               |                                                          | 9              | -12.80                        |
|                               |                                                          | 10             | -12.54                        |

a. Number of GA runs are shown in parentheses. b. The cluster rank is the absolute ranking as determined by the docked free energy defined by AutoDock.

**Table S4.** List of DNA sequences used in this research.

| Name    | Sequence                           |
|---------|------------------------------------|
| c-MYC   | 5'-TGAGGGTGGGTAGGGTGGGTAA-3'       |
| VEGF    | 5'-CGGGGCGGGCCTTGGGCGGGGT-3'       |
| MYT1L   | 5'-AGGGAGAGGAGAGCTCTGGGTGGGTGGG-3' |
| ds-12CT | 5'-CTTTTGCAAAG-3'                  |
| ds-26   | 5'-CAATCGGATCGAATTCGATCCGATTG-3'   |

**Table S5.** The nearest gene of ChromHMM annotation

| Roadmap | Standardized Epigenome name                           | AGE (Years) | SEX     | ETHNICITY                             |
|---------|-------------------------------------------------------|-------------|---------|---------------------------------------|
| E027    | Breast Myoepithelial Primary Cells                    | 36Y,33Y     | Female  | African-American,<br>African-American |
| E028    | Breast variant Human Mammary Epithelial Cells (vHMEC) | 18Y         | Female  | Caucasian                             |
| E119    | Human Mammary Epithelial Primary Cells (HMEC)         | Unknown     | Unknown | Unknown                               |

**Table S6.** The Quadruplex forming G-Rich Sequences (QGRS) in the significant enrichment genes associated with G4 deletions in the **CP** group.

|           |                            |        |        |         |         |       |         |         |           |       |      |
|-----------|----------------------------|--------|--------|---------|---------|-------|---------|---------|-----------|-------|------|
| <b>CP</b> | Gene Name                  | CDH4   | SNTG2  | GRTP1   | C7orf50 | ATP9B | CIMAP1D | COL18A1 | MIR3667HG | EARP  | NGEF |
|           | QGRS in full gene sequence | 6129   | 2313   | 365     | 1511    | 1468  | 113     | 1345    | 2133      | 1460  | 976  |
|           | QGRS in promoter sequence  | 17     | 17     | 23      | 23      | 24    | 21      | 31      | 24        | 16    | 19   |
|           | Gene Name                  | IGSF21 | LARGE1 | SLC16A3 | COL6A1  | MUC4  | C4orf19 | PADI4   | c-MYC     | DHRXS | VEGF |
|           | QGRS in full gene sequence | 2311   | 4473   | 518     | 338     | 592   | 882     | 493     | 74        | 1916  | 207  |
|           | QGRS in promoter sequence  | 20     | 27     | 32      | 15      | 29    | 8       | 16      | 17        | 21    | 24   |

**Table S7.** The **CP** group had the highest proportion of G4 deletions in whole-genome sequencing.

|                            |         |          |        |            |       |         |
|----------------------------|---------|----------|--------|------------|-------|---------|
| Inhibition of tumor growth | SOX6    | LAMA5    | APP    | URB1       | DIP2C | c-MYC   |
|                            | GNAQ    | BRSK2    | CDH4   | MYT1       | VEGF  |         |
| Antitumor immunity         | SYNE2   | TNFRSF1A | APLP2  | HNF1A      | MYO10 | TRAPPC9 |
|                            | LGR4    |          |        |            |       |         |
| Other                      | PPP2R2C | CACNG7   | FBRSL1 | PPHLN1     | SAXO1 | COL26A1 |
|                            | ANKRD11 | ADARB2   | NKAIN3 | AC000093.1 |       |         |

**Table S8.** The Quadruplex forming G-Rich Sequences (QGRS) in the genes of which the expression was significantly regulated by **CP**, **TP**, **DP** and **PyPDS** in the RNA-seq studies.

|           |                            |        |        |         |         |          |         |        |           |         |       |
|-----------|----------------------------|--------|--------|---------|---------|----------|---------|--------|-----------|---------|-------|
| <b>CP</b> | Gene Name                  | SOX6   | AACS   | TACC2   | CREB3L1 | CDH4     | ABCA3   | CD44   | FEZF1     | FAM219A | FARP1 |
|           | QGRS in full gene sequence | 2552   | 687    | 2041    | 427     | 6129     | 632     | 495    | 66        | 445     | 1880  |
|           | QGRS in promoter sequence  | 11     | 19     | 15      | 23      | 17       | 26      | 21     | 12        | 30      | 16    |
|           | Gene Name                  | PIGX   | PINK1  | PYROXD2 | c-MYC   | FAM187A  | ITGA5   | APBB2  | CNTNAP1   | APOL2   | VEGF  |
|           | QGRS in full gene sequence | 620    | 173    | 297     | 74      | 30       | 244     | 2208   | 199       | 137     | 207   |
|           | QGRS in promoter sequence  | 15     | 13     | 15      | 17      | 14       | 32      | 24     | 18        | 22      | 24    |
| <b>TP</b> | Gene Name                  | VDR    | KANK1  | ZHX3    | NR3C2   | EDN1     | CREB3L2 | TESMIN | PHACTR4   | ZNF329  | RTN4  |
|           | QGRS in full gene sequence | 797    | 1399   | 736     | 1394    | 42       | 757     | 260    | 720       | 203     | 553   |
|           | QGRS in promoter sequence  | 26     | 13     | 15      | 26      | 10       | 21      | 20     | 15        | 25      | 15    |
|           | Gene Name                  | GNL3L  | RCBTB1 | HERPUD2 | RGMB    | AMPH     | AP1S3   | LMO7   | CHD8      | PAM     | SRCAP |
|           | QGRS in full gene sequence | 504    | 281    | 275     | 170     | 1005     | 927     | 989    | 401       | 817     | 337   |
|           | QGRS in promoter sequence  | 13     | 13     | 19      | 7       | 18       | 28      | 12     | 17        | 15      | 25    |
| <b>DP</b> | Gene Name                  | RCN3   | NPDC1  | PHLDB1  | GPAA1   | C16orf74 | CREB3L1 | PPARD  | ARHGEF10L | FAM219A | SPEG  |
|           | QGRS in full gene sequence | 200    | 117    | 546     | 99      | 577      | 427     | 681    | 1738      | 445     | 669   |
|           | QGRS in promoter sequence  | 20     | 33     | 13      | 19      | 28       | 23      | 22     | 17        | 30      | 13    |
|           | Gene Name                  | ZNF213 | MAP4   | EML2    | TBC1D24 | ITGA5    | CNTNAP1 | NXPH4  | SLC37A4   | PTPN23  | TAGLN |
|           | QGRS in full gene sequence | 144    | 1380   | 409     | 378     | 244      | 199     | 116    | 86        | 278     | 118   |
|           | QGRS in promoter sequence  | 21     | 22     | 26      | 25      | 32       | 18      | 23     | 24        | 11      | 25    |

| PyPDS | Gene Name                  | DPM2  | MSRB1  | RPS11 | PNMA1 | RPS17 | KRTCAP2 | TMEM216 | DPY30 | SMARCD3 | NCBP2-AS2 |
|-------|----------------------------|-------|--------|-------|-------|-------|---------|---------|-------|---------|-----------|
|       | QGRS in full gene sequence | 40    | 78     | 50    | 29    | 49    | 41      | 46      | 751   | 431     | 21        |
|       | QGRS in promoter sequence  | 20    | 29     | 14    | 20    | 18    | 17      | 17      | 18    | 12      | 16        |
|       | Gene Name                  | ATF6B | NDUFS6 | TUT1  | GCSH  | ERAL1 | ECHS1   | VPS4A   | ABCC6 | NAPRT   | PDCL3     |
|       | QGRS in full gene sequence | 131   | 137    | 148   | 92    | 60    | 106     | 163     | 586   | 69      | 100       |
|       | QGRS in promoter sequence  | 17    | 16     | 13    | 14    | 12    | 14      | 15      | 20    | 30      | 19        |

## References

1. L. Y. Liu, T. Z. Ma, Y. L. Zeng, W. T. Liu and Z. W. Mao, Structural Basis of Pyridostatin and Its Derivatives Specifically Binding to G-Quadruplexes, *J. Am. Chem. Soc.*, 2022, **144**, 11878-11887.
2. L. Y. Liu, H. B. Fang, Q. X. Chen, M. H. Y. Chan, M. Ng, K. N. Wang, W. Liu, Z. Q. Tian, J. J. Diao, Z. W. Mao and V. W. W. Yam, Multiple-Color Platinum Complex with Super-Large Stokes Shift for Super-Resolution Imaging of Autolysosome Escape, *Angew. Chem. Int. Ed.*, 2020, **59**, 19229-19236.
